# Supplementary material for: Novichok <span aria-describedby="tippy-18">Nerve Agents as Inhibitors of Acetylcholinesterase – In Silico Study of Their Non-covalent Binding Affinity
Source: Preprints.org preprint supplement (doi:10.20944/preprints202312.0256.v1), 2023-12-05
Supplement: Supplementary file 1 [file supplementary]

# Novichok nerve agents as inhibitors of acetylcholinesterase – *in silico* study of their non-covalent binding affinity

Rafał Madaj <sup>a,b\*</sup>, Bartłomiej Gostyński <sup>a\*</sup>, Arkadiusz Chworos <sup>a</sup>

<sup>a</sup> Centre of Molecular and Macromolecular Studies, Polish Academy of Sciences, Sienkiewicza 112, 90-363 Łódź, Poland

<sup>b</sup> Institute of Evolutionary Biology, Faculty of Biology, Biological and Chemical Research Centre, University of Warsaw, Żwirki i Wigury 101, 02—089 Warsaw, Poland

e-mail: r.madaj@uw.edu.pl, bgostyns@cbmm.lodz.pl, achworos@cbmm.lodz.pl

## SUPPLEMENTARY INFO

### Cartesian coordinates for all optimized ligands

#### Acetylcholine

|   |             |             |             |
|---|-------------|-------------|-------------|
| N | 1.81472200  | 0.09965400  | 0.07096600  |
| C | 0.56813000  | -0.54277800 | 0.66129000  |
| C | 2.70784800  | 0.51120000  | 1.21159300  |
| C | 2.55313200  | -0.88183800 | -0.79646600 |
| C | 1.46441900  | 1.33071700  | -0.72918400 |
| C | -0.39946300 | -1.15386800 | -0.36566000 |
| C | -2.29576300 | 0.21794100  | -0.05371700 |
| C | -3.73266400 | 0.22975800  | 0.35527800  |
| O | -1.74405600 | -1.02497200 | 0.09307200  |
| O | -1.65095100 | 1.14898600  | -0.46822900 |
| H | 0.06181800  | 0.24015000  | 1.21664000  |
| H | 0.91629500  | -1.29841100 | 1.36183600  |
| H | 2.16573100  | 1.20291700  | 1.84991100  |
| H | 2.99414000  | -0.37159900 | 1.77618900  |
| H | 3.59201200  | 0.99586800  | 0.80728500  |
| H | 1.93902200  | -1.14170400 | -1.65248000 |
| H | 2.77663000  | -1.77036400 | -0.21202300 |
| H | 3.47570000  | -0.42140100 | -1.13825900 |
| H | 0.81529300  | 1.06110600  | -1.55268700 |
| H | 2.38757300  | 1.76731700  | -1.09950300 |
| H | 0.93840500  | 2.02766400  | -0.08546000 |
| H | -0.23523500 | -2.22206800 | -0.47356700 |
| H | -0.30287900 | -0.68076700 | -1.34129500 |
| H | -3.84695300 | -0.20870300 | 1.34593400  |
| H | -4.10633100 | 1.24820900  | 0.34154500  |
| H | -4.30805800 | -0.38470000 | -0.33838300 |

**A230 [R]**

|   |             |             |             |
|---|-------------|-------------|-------------|
| N | -0.54604600 | 0.24385600  | 0.13208200  |
| N | 1.71824600  | 0.12162000  | -0.00857800 |
| C | 0.50530500  | -0.46175200 | -0.15699100 |
| C | 0.47427200  | -1.88717100 | -0.66262100 |
| C | 2.98381700  | -0.52328600 | -0.35563800 |
| C | 3.67234600  | -1.17554900 | 0.84206300  |
| C | 1.80778400  | 1.50311500  | 0.47811900  |
| C | 1.64511900  | 2.52597600  | -0.64239200 |
| C | -2.90899200 | 0.73089100  | 1.41839600  |
| O | -2.54615500 | -1.59614800 | -0.04021700 |
| P | -2.13151400 | -0.17783400 | 0.06779700  |
| F | -2.63967100 | 0.66977200  | -1.18908400 |
| H | 0.71227200  | -1.90499200 | -1.72823400 |
| H | 1.20036400  | -2.51359100 | -0.14731000 |
| H | -0.51973600 | -2.30028400 | -0.52829400 |
| H | 3.63097100  | 0.24406300  | -0.78401300 |
| H | 2.82188100  | -1.25357800 | -1.14356800 |
| H | 4.63030800  | -1.60383700 | 0.54397400  |
| H | 3.85888500  | -0.44678600 | 1.63120200  |
| H | 3.05631900  | -1.97139700 | 1.26036200  |
| H | 2.77816000  | 1.61468300  | 0.96286700  |
| H | 1.03856200  | 1.64900100  | 1.23195600  |
| H | 2.40365800  | 2.38899300  | -1.41491100 |
| H | 0.66151700  | 2.42554900  | -1.09750300 |
| H | 1.74367600  | 3.53863500  | -0.24890400 |
| H | -2.63359400 | 1.78236300  | 1.37644900  |
| H | -3.98927600 | 0.62323200  | 1.33806800  |
| H | -2.57829800 | 0.30500600  | 2.36424500  |

**A230 [S]**

|   |             |             |             |
|---|-------------|-------------|-------------|
| N | -0.54843200 | 0.24600800  | 0.09440800  |
| N | 1.71579600  | 0.13289000  | -0.04859600 |
| C | 0.50325900  | -0.44356000 | -0.22825500 |
| C | 0.47891600  | -1.84124400 | -0.80756700 |
| C | 2.98440000  | -0.50180600 | -0.40299300 |
| C | 3.64765000  | -1.21416300 | 0.77494400  |
| C | 1.80452200  | 1.47997100  | 0.52635900  |
| C | 1.66732000  | 2.57247000  | -0.52989500 |
| O | -2.57662200 | -1.44704200 | -0.57101100 |
| P | -2.13383100 | -0.17852600 | 0.05338100  |
| H | 0.83380600  | -1.82439300 | -1.83969500 |
| H | 1.12689200  | -2.51206400 | -0.24462900 |
| H | -0.53489600 | -2.22511300 | -0.80185200 |
| H | 3.64327300  | 0.28086900  | -0.78324900 |
| H | 2.83361300  | -1.19466200 | -1.22589700 |
| H | 4.60802900  | -1.63444300 | 0.47327100  |
| H | 3.82487300  | -0.52519900 | 1.60100300  |
| H | 3.01976500  | -2.02470900 | 1.14426700  |
| H | 2.76735200  | 1.55579800  | 1.03244900  |

|   |             |             |             |
|---|-------------|-------------|-------------|
| H | 1.02319000  | 1.58223700  | 1.27480100  |
| H | 2.43695800  | 2.47909300  | -1.29793300 |
| H | 0.69074600  | 2.50839600  | -1.00652800 |
| H | 1.76494400  | 3.55782700  | -0.07217000 |
| C | -2.99615000 | 1.29152500  | -0.54005900 |
| H | -4.06859700 | 1.13602000  | -0.43585600 |
| H | -2.68868100 | 2.16739800  | 0.02694500  |
| H | -2.75895300 | 1.43676900  | -1.59278800 |
| F | -2.51254600 | -0.13567100 | 1.60437100  |

# A232 [R]

|   |             |             |             |
|---|-------------|-------------|-------------|
| N | -0.25176300 | 0.24003700  | -0.03475800 |
| N | 2.01068900  | 0.12488300  | 0.04023400  |
| C | 0.82294100  | -0.46450000 | -0.22243300 |
| C | 0.84492900  | -1.88952000 | -0.72842500 |
| C | 2.04342800  | 1.50498900  | 0.54206300  |
| C | 1.98685700  | 2.53312900  | -0.58367700 |
| C | 3.30729900  | -0.51395000 | -0.18068800 |
| C | 3.87707800  | -1.16319300 | 1.07940400  |
| O | -2.24564400 | -1.55997300 | -0.52805000 |
| P | -1.80823300 | -0.18011400 | -0.22792200 |
| H | 1.21630700  | -1.91177400 | -1.75487000 |
| H | 1.49646500  | -2.51821800 | -0.12379900 |
| H | -0.15978200 | -2.29797600 | -0.72106800 |
| H | 2.96077300  | 1.61728000  | 1.12065200  |
| H | 1.20178200  | 1.64158000  | 1.21587700  |
| H | 2.04495500  | 3.54322900  | -0.17616800 |
| H | 2.81599000  | 2.40206200  | -1.28114700 |
| H | 1.05070000  | 2.43526600  | -1.13016800 |
| H | 3.98935800  | 0.25694000  | -0.54331900 |
| H | 3.22721500  | -1.24507200 | -0.98037100 |
| H | 4.86168700  | -1.58684000 | 0.87700300  |
| H | 3.98142800  | -0.43390000 | 1.88294500  |
| H | 3.22671700  | -1.96213200 | 1.43518600  |
| F | -2.29012000 | 0.81278000  | -1.37069400 |
| O | -2.48845700 | 0.46934600  | 1.06516900  |
| C | -3.87583200 | 0.19476100  | 1.32553000  |
| H | -4.08804100 | -0.86634300 | 1.19921800  |
| H | -4.06141400 | 0.49474300  | 2.35367900  |
| H | -4.50944600 | 0.77813000  | 0.65549000  |

**A232 [S]**

|   |             |             |             |
|---|-------------|-------------|-------------|
| N | -0.23729500 | 0.14748300  | 0.24788500  |
| N | 2.00685400  | 0.18153200  | -0.06501500 |
| C | 0.82376400  | -0.45999200 | -0.18982600 |
| C | 0.83298800  | -1.82509900 | -0.84089200 |
| C | -3.92547100 | 0.74304500  | -0.78602100 |
| C | 2.05221500  | 1.50880600  | 0.56298500  |
| C | 1.73560400  | 2.62836000  | -0.42387600 |
| C | 3.28031900  | -0.34889700 | -0.54976500 |
| C | 4.08041100  | -1.06797500 | 0.53506300  |
| O | -2.21032100 | -1.68835500 | -0.19894900 |
| O | -2.52405100 | 0.86798800  | -0.48795500 |
| P | -1.78443800 | -0.34538900 | 0.24860700  |
| F | -2.20900400 | -0.10466200 | 1.75787300  |
| H | 1.05463500  | -1.72715500 | -1.90533000 |
| H | 1.59159900  | -2.47021900 | -0.40028100 |
| H | -0.14113100 | -2.28995800 | -0.73635700 |
| H | -4.16014100 | 1.52837000  | -1.50000200 |
| H | -4.51880800 | 0.88378800  | 0.11889900  |
| H | -4.14096000 | -0.23399900 | -1.21732900 |
| H | 3.05117100  | 1.63464700  | 0.98120100  |
| H | 1.34018500  | 1.52168100  | 1.38399500  |
| H | 1.81221800  | 3.59866300  | 0.06849900  |
| H | 2.43013400  | 2.62072700  | -1.26577600 |
| H | 0.72206600  | 2.51347000  | -0.80356100 |
| H | 3.85388200  | 0.49400700  | -0.93905200 |
| H | 3.10742400  | -1.01084200 | -1.39368900 |
| H | 5.03859200  | -1.40715900 | 0.13916600  |
| H | 4.27810600  | -0.40712800 | 1.37922600  |
| H | 3.53770800  | -1.93574500 | 0.90955600  |

**A234 [R]**

|   |             |             |             |
|---|-------------|-------------|-------------|
| N | -0.08272000 | -0.04585600 | 0.37459500  |
| N | -2.27440200 | 0.30710100  | -0.08127400 |
| C | -1.15522300 | -0.43335800 | -0.24605900 |
| C | -1.24339000 | -1.64249900 | -1.15041500 |
| C | 3.73370300  | 0.29949700  | -0.29186500 |
| C | 4.26529200  | 1.47753700  | -1.07702000 |
| C | -2.24231700 | 1.48956000  | 0.78960500  |
| C | -1.72408600 | 2.72891500  | 0.06627500  |
| C | -3.54539700 | 0.02822600  | -0.74797100 |
| C | -4.50896800 | -0.78325700 | 0.11641500  |
| O | 1.71996000  | -1.99280400 | -0.27114800 |
| P | 1.40131400  | -0.70722200 | 0.38581300  |
| H | -1.35609900 | -1.32255200 | -2.18807200 |
| H | -2.10045500 | -2.26528600 | -0.89863600 |
| H | -0.33502400 | -2.22934400 | -1.07016900 |
| H | 4.23187300  | 0.21292200  | 0.67666100  |
| H | 3.86356200  | -0.63865600 | -0.83250500 |
| H | 5.33530700  | 1.35670400  | -1.25240800 |

|   |             |             |             |
|---|-------------|-------------|-------------|
| H | 4.10619200  | 2.40736600  | -0.53116200 |
| H | 3.76214600  | 1.55249800  | -2.04089000 |
| H | -1.61113800 | 1.26524200  | 1.64550200  |
| H | -3.25749300 | 1.65154000  | 1.15275700  |
| H | -1.74647000 | 3.59219800  | 0.73267300  |
| H | -2.33546400 | 2.96056300  | -0.80766400 |
| H | -0.69693700 | 2.56856500  | -0.25603300 |
| H | -3.36405900 | -0.47979000 | -1.69102600 |
| H | -3.99373600 | 0.98978900  | -1.00377800 |
| H | -5.45662200 | -0.92860800 | -0.40392400 |
| H | -4.09255400 | -1.76288600 | 0.35040800  |
| H | -4.71468600 | -0.27368000 | 1.05791000  |
| F | 1.71469500  | -0.78737100 | 1.93886200  |
| O | 2.32152100  | 0.52051200  | -0.06430700 |

#### A234 [S]

|   |             |             |             |
|---|-------------|-------------|-------------|
| N | -0.09986500 | -0.14879300 | 0.14192200  |
| N | 2.11863300  | 0.31846600  | 0.02810500  |
| C | 1.11663200  | -0.59127400 | 0.04204800  |
| C | 1.49776000  | -2.05201400 | -0.04430400 |
| C | -2.73696000 | 1.33341100  | -0.29333800 |
| C | -3.79525500 | 1.88101200  | -1.22485900 |
| C | 1.80334500  | 1.74961500  | 0.10051300  |
| C | 1.59562200  | 2.23008900  | 1.53368200  |
| C | 3.53840800  | -0.02938200 | -0.01824900 |
| C | 4.11706100  | 0.00220400  | -1.43170100 |
| O | -1.58975300 | -2.39152400 | -0.25677700 |
| O | -2.55203100 | -0.06244300 | -0.60985400 |
| P | -1.50621700 | -0.98307600 | 0.16179700  |
| F | -1.96789300 | -0.78008900 | 1.67137200  |
| H | 1.94184200  | -2.37402900 | 0.89983000  |
| H | 2.22509400  | -2.23105700 | -0.83423800 |
| H | 0.61272100  | -2.65095700 | -0.22983000 |
| H | -3.04299700 | 1.42207400  | 0.75102400  |
| H | -1.78545100 | 1.85325200  | -0.41743600 |
| H | -3.96542300 | 2.93834300  | -1.01595400 |
| H | -4.73496000 | 1.34519000  | -1.09493600 |
| H | -3.48124100 | 1.77753000  | -2.26325300 |
| H | 0.90864500  | 1.93201300  | -0.48981300 |
| H | 2.62738400  | 2.28741800  | -0.36892100 |
| H | 1.38958600  | 3.30126900  | 1.54828500  |
| H | 2.48325300  | 2.04899300  | 2.14199800  |
| H | 0.75263700  | 1.70865700  | 1.98308200  |
| H | 3.69338000  | -1.00540800 | 0.43296600  |
| H | 4.06680100  | 0.68384300  | 0.61681200  |
| H | 5.18455600  | -0.22115600 | -1.41097600 |
| H | 3.62562700  | -0.73109800 | -2.07086500 |
| H | 3.98604100  | 0.98412900  | -1.88696600 |

#### Sarin [R]

|   |             |             |             |
|---|-------------|-------------|-------------|
| C | -1.51801400 | 1.44172300  | 0.75248500  |
| C | 1.54115200  | 0.08732900  | 0.20570000  |
| C | 2.21194200  | -1.27241400 | 0.14150800  |
| C | 2.42435500  | 1.22610700  | -0.26626100 |
| O | -2.07866500 | -0.45467600 | -1.20268200 |
| O | 0.37508600  | 0.06150000  | -0.67337000 |
| P | -1.12604800 | -0.06126300 | -0.16256300 |
| F | -0.98904700 | -1.11672000 | 1.02405900  |
| H | -0.76102400 | 1.65756700  | 1.50457700  |
| H | -1.57801700 | 2.26709200  | 0.04562700  |
| H | -2.48442000 | 1.31628200  | 1.23695800  |
| H | 1.20460800  | 0.27817800  | 1.22792200  |
| H | 3.09760800  | -1.28557400 | 0.77811300  |
| H | 1.52994200  | -2.05143700 | 0.47767200  |
| H | 2.51430000  | -1.49126200 | -0.88269300 |
| H | 1.89502900  | 2.17680700  | -0.20967000 |
| H | 3.32037400  | 1.28958800  | 0.35197100  |
| H | 2.72576700  | 1.06111900  | -1.30073400 |

#### **Sarin [S]**

|   |             |             |             |
|---|-------------|-------------|-------------|
| C | -1.54117100 | 0.08730200  | 0.20571600  |
| C | -2.42418800 | 1.22624300  | -0.26620000 |
| C | -2.21217900 | -1.27233100 | 0.14143800  |
| O | 2.07867700  | -0.45449900 | -1.20274300 |
| O | -0.37510400 | 0.06129200  | -0.67333200 |
| P | 1.12604600  | -0.06128700 | -0.16256300 |
| H | -1.20461300 | 0.27802400  | 1.22795500  |
| H | -3.32017100 | 1.28988800  | 0.35206800  |
| H | -1.89468600 | 2.17684600  | -0.20962900 |
| H | -2.72566900 | 1.06131600  | -1.30066300 |
| H | -1.53030500 | -2.05148200 | 0.47756400  |
| H | -3.09785600 | -1.28538900 | 0.77803200  |
| H | -2.51455900 | -1.49107700 | -0.88277800 |
| F | 0.98918500  | -1.11680800 | 1.02400800  |
| C | 1.51796500  | 1.44167800  | 0.75254800  |
| H | 2.48446500  | 1.31626700  | 1.23682200  |
| H | 1.57777100  | 2.26712300  | 0.04578400  |
| H | 0.76111800  | 1.65735700  | 1.50481000  |

**Soman [RR]**

|   |             |             |             |
|---|-------------|-------------|-------------|
| C | -0.71716600 | 0.65466300  | -0.19948000 |
| C | -0.92400100 | 2.11267500  | 0.17766600  |
| C | -1.93763500 | -0.28006900 | -0.02272400 |
| C | -1.53573100 | -1.70573600 | -0.43470000 |
| C | -2.41949900 | -0.29147200 | 1.43464500  |
| C | -3.06832700 | 0.20040800  | -0.94681900 |
| O | 0.36597500  | 0.14577700  | 0.63912000  |
| O | 2.60839500  | -0.98994400 | 1.09778800  |
| P | 1.82969300  | -0.20871000 | 0.13401600  |
| H | -0.40299300 | 0.58711200  | -1.24434100 |
| H | -0.01036600 | 2.67836000  | -0.00028400 |
| H | -1.71715700 | 2.56324900  | -0.41610800 |
| H | -1.17609700 | 2.20726400  | 1.23202900  |
| H | -0.76615400 | -2.10727400 | 0.22176000  |
| H | -2.40176100 | -2.36651600 | -0.38149900 |
| H | -1.15370600 | -1.73142400 | -1.45656200 |
| H | -3.22614500 | -1.01620300 | 1.55241300  |
| H | -1.61099900 | -0.57167400 | 2.10873300  |
| H | -2.80530800 | 0.68020800  | 1.74418500  |
| H | -3.89840600 | -0.50588900 | -0.91168700 |
| H | -3.45633500 | 1.17484300  | -0.65087400 |
| H | -2.73470400 | 0.26590900  | -1.98495200 |
| F | 1.54470500  | -0.97359100 | -1.23375900 |
| C | 2.59350700  | 1.30433900  | -0.47938800 |
| H | 2.75434000  | 1.97819200  | 0.35984500  |
| H | 3.55390300  | 1.05419000  | -0.92602300 |
| H | 1.96232200  | 1.78710100  | -1.22350300 |

**Soman [RS]**

|   |             |             |             |
|---|-------------|-------------|-------------|
| C | 0.72448400  | 0.55008900  | -0.32087500 |
| C | 1.96395100  | -0.29978200 | 0.04327200  |
| C | 2.40903300  | -0.03984900 | 1.48930900  |
| C | 1.60927700  | -1.78685100 | -0.11775500 |
| C | 3.10656100  | 0.04118700  | -0.92655400 |
| O | -0.35369400 | 0.17021700  | 0.58935400  |
| O | -2.79894100 | -0.07360100 | 1.29719700  |
| P | -1.86699800 | -0.06862100 | 0.16727800  |
| H | 1.59434500  | -0.22652200 | 2.18764300  |
| H | 3.23824600  | -0.69999900 | 1.74739300  |
| H | 2.75091800  | 0.98561200  | 1.62888700  |
| H | 2.48062800  | -2.40743200 | 0.09375200  |
| H | 0.81528100  | -2.07970200 | 0.56703300  |
| H | 1.28482500  | -2.00839900 | -1.13705200 |
| H | 3.95034700  | -0.62779500 | -0.75379800 |
| H | 2.79707300  | -0.07855700 | -1.96739600 |
| H | 3.46518000  | 1.06124400  | -0.79390800 |
| C | 0.88505200  | 2.05898500  | -0.23285100 |
| H | -0.04640900 | 2.54226000  | -0.51995700 |
| H | 1.12743700  | 2.36284300  | 0.78363600  |

|   |             |             |             |
|---|-------------|-------------|-------------|
| H | 1.66912800  | 2.40781200  | -0.90276200 |
| H | 0.42756500  | 0.28301500  | -1.33963800 |
| C | -1.93144400 | -1.50275700 | -0.92244100 |
| H | -2.94170500 | -1.58887600 | -1.31791300 |
| H | -1.22554800 | -1.41091500 | -1.74522600 |
| H | -1.69835200 | -2.39166800 | -0.34010100 |
| F | -2.11826600 | 1.11192500  | -0.87386700 |

#### Soman [SR]

|   |             |             |             |
|---|-------------|-------------|-------------|
| C | -0.72444900 | 0.55009800  | -0.32079700 |
| C | -0.88500200 | 2.05900000  | -0.23269700 |
| C | 1.93124500  | -1.50298900 | -0.92219600 |
| C | -1.96390900 | -0.29976200 | 0.04337800  |
| C | -1.60918700 | -1.78683600 | -0.11751100 |
| C | -2.40906600 | -0.03975300 | 1.48937900  |
| C | -3.10645400 | 0.04110200  | -0.92655200 |
| O | 0.35374500  | 0.17029000  | 0.58943400  |
| O | 2.79912600  | -0.07321400 | 1.29692700  |
| P | 1.86699200  | -0.06858900 | 0.16716800  |
| F | 2.11800600  | 1.11165000  | -0.87439400 |
| H | -0.42754900 | 0.28306400  | -1.33957300 |
| H | 0.04642900  | 2.54226900  | -0.51990400 |
| H | -1.66917400 | 2.40788400  | -0.90246400 |
| H | -1.12722800 | 2.36279100  | 0.78384800  |
| H | 2.94143500  | -1.58923400 | -1.31781200 |
| H | 1.69818900  | -2.39176300 | -0.33964200 |
| H | 1.22521200  | -1.41127300 | -1.74488500 |
| H | -0.81535900 | -2.07964700 | 0.56749100  |
| H | -2.48058500 | -2.40741600 | 0.09380500  |
| H | -1.28446800 | -2.00842700 | -1.13671100 |
| H | -3.23809300 | -0.70010200 | 1.74755300  |
| H | -1.59432000 | -0.22611900 | 2.18772900  |
| H | -2.75122900 | 0.98562800  | 1.62883900  |
| H | -3.95029300 | -0.62779000 | -0.75370500 |
| H | -3.46500900 | 1.06121100  | -0.79410600 |
| H | -2.79692800 | -0.07885600 | -1.96735800 |

#### Soman [SS]

|   |             |             |             |
|---|-------------|-------------|-------------|
| C | 0.71715200  | 0.65464200  | -0.19939400 |
| C | -2.59330400 | 1.30435900  | -0.47975500 |
| C | 1.93764100  | -0.28006200 | -0.02262600 |
| C | 2.41942600  | -0.29153400 | 1.43476900  |
| C | 1.53580400  | -1.70571800 | -0.43470500 |
| C | 3.06836800  | 0.20050300  | -0.94663200 |
| O | -0.36600900 | 0.14569000  | 0.63914100  |
| O | -2.60859300 | -0.98973700 | 1.09769600  |
| P | -1.82971100 | -0.20869400 | 0.13391700  |
| F | -1.54465200 | -0.97375700 | -1.23374100 |
| H | -3.55368500 | 1.05424900  | -0.92644400 |
| H | -2.75414200 | 1.97834000  | 0.35937400  |

|   |             |             |             |
|---|-------------|-------------|-------------|
| H | -1.96200400 | 1.78695400  | -1.22388000 |
| H | 1.61090100  | -0.57181200 | 2.10879600  |
| H | 3.22609600  | -1.01623800 | 1.55253500  |
| H | 2.80517700  | 0.68014300  | 1.74439100  |
| H | 2.40184900  | -2.36647500 | -0.38148400 |
| H | 0.76619500  | -2.10731300 | 0.22168100  |
| H | 1.15384600  | -1.73136100 | -1.45659400 |
| H | 3.89846000  | -0.50578000 | -0.91150600 |
| H | 2.73479600  | 0.26606800  | -1.98477700 |
| H | 3.45634300  | 1.17492500  | -0.65060100 |
| C | 0.92393100  | 2.11264500  | 0.17781900  |
| H | 0.01028200  | 2.67830800  | -0.00012500 |
| H | 1.17599900  | 2.20719500  | 1.23219300  |
| H | 1.71708700  | 2.56327200  | -0.41591500 |
| H | 0.40302500  | 0.58712100  | -1.24427100 |

# **Tabun [R]**

|   |             |             |             |
|---|-------------|-------------|-------------|
| N | 0.70391700  | 2.74772600  | -0.96216900 |
| N | 1.00222300  | -0.88086100 | -0.43477200 |
| C | 0.59569400  | 1.77137900  | -0.36099400 |
| C | -1.99554500 | 0.03579200  | -0.60826900 |
| C | -3.39874500 | -0.37213700 | -0.22400100 |
| C | 2.39011400  | -0.72720600 | -0.87968300 |
| C | 0.61562500  | -2.27757400 | -0.20881400 |
| O | 0.94182600  | 0.40864000  | 1.96623600  |
| O | -1.18773200 | 0.02121200  | 0.59940700  |
| P | 0.38599300  | 0.26157200  | 0.61392500  |
| H | -1.97325200 | 1.04324800  | -1.02704600 |
| H | -1.55858300 | -0.64840100 | -1.33698500 |
| H | -4.04080700 | -0.35659100 | -1.10549100 |
| H | -3.40863300 | -1.37800400 | 0.19487300  |
| H | -3.80744400 | 0.31433800  | 0.51613300  |
| H | 2.61703600  | 0.31979100  | -1.07187800 |
| H | 3.10151200  | -1.10968800 | -0.14150300 |
| H | 2.52169500  | -1.27519600 | -1.81345900 |
| H | -0.41192300 | -2.33500800 | 0.14221000  |
| H | 0.69189300  | -2.82179700 | -1.15124100 |
| H | 1.26002200  | -2.76466100 | 0.52951900  |

**Tabun [S]**

|   |             |             |             |
|---|-------------|-------------|-------------|
| N | -0.70292500 | 2.74788300  | -0.96204800 |
| N | -1.00255600 | -0.88060400 | -0.43484900 |
| C | -0.59512100 | 1.77146200  | -0.36091900 |
| C | 1.99558200  | 0.03539600  | -0.60826400 |
| C | 3.39875200  | -0.37262800 | -0.22399800 |
| C | -0.61647100 | -2.27747600 | -0.20896000 |
| C | -2.39042000 | -0.72643000 | -0.87968000 |
| O | -0.94168300 | 0.40873400  | 1.96626700  |
| O | 1.18773800  | 0.02066800  | 0.59938800  |
| P | -0.38591600 | 0.26154200  | 0.61394500  |
| H | 1.55862800  | -0.64871700 | -1.33705900 |
| H | 1.97332400  | 1.04290400  | -1.02692000 |
| H | 4.04084100  | -0.35700700 | -1.10546500 |
| H | 3.80744800  | 0.31374700  | 0.51622900  |
| H | 3.40857500  | -1.37854400 | 0.19476300  |
| H | 0.41109500  | -2.33530300 | 0.14194500  |
| H | -1.26097500 | -2.76432900 | 0.52943500  |
| H | -0.69304800 | -2.82164200 | -1.15139100 |
| H | -2.61699800 | 0.32066700  | -1.07173700 |
| H | -2.52224100 | -1.27426900 | -1.81350800 |
| H | -3.10190700 | -1.10875000 | -0.14150300 |

**VX [R]**

|   |             |             |             |
|---|-------------|-------------|-------------|
| N | -2.39880200 | 0.15433700  | -0.28128400 |
| C | -1.34528600 | -0.79766700 | 0.01153800  |
| C | -3.78170000 | -0.28253000 | -0.06180400 |
| C | -4.22724700 | -1.21546800 | -1.19281100 |
| C | -4.06537600 | -0.92542600 | 1.30866100  |
| C | -2.04557500 | 1.54867100  | 0.03133600  |
| C | -2.68741100 | 2.51992900  | -0.96121800 |
| C | -2.32337200 | 1.97283100  | 1.48166700  |
| C | -0.34602000 | -0.84838500 | -1.14686100 |
| O | 1.51127100  | 0.96405100  | 0.41153000  |
| P | 2.17053900  | -0.36984000 | 0.39902500  |
| S | 1.17610000  | -1.82929700 | -0.76810500 |
| H | -1.76109000 | -1.79393200 | 0.15251600  |
| H | -0.81339400 | -0.55025500 | 0.93846500  |
| H | -4.39356300 | 0.61785300  | -0.12705800 |
| H | -3.63250000 | -2.13158100 | -1.19923000 |
| H | -5.27339900 | -1.50446600 | -1.07527600 |
| H | -4.10273100 | -0.72670400 | -2.15828400 |
| H | -5.13486400 | -1.11203200 | 1.42153900  |
| H | -3.74559400 | -0.28578600 | 2.12840800  |
| H | -3.55748000 | -1.88560200 | 1.41218300  |
| H | -0.96527600 | 1.61073000  | -0.10731200 |
| H | -2.32524200 | 3.53460800  | -0.78853600 |
| H | -3.77459600 | 2.54173900  | -0.86375900 |
| H | -2.44520700 | 2.23198100  | -1.98390600 |
| H | -1.91308400 | 2.96629300  | 1.66870600  |

|   |             |             |             |
|---|-------------|-------------|-------------|
| H | -1.85815200 | 1.28466500  | 2.18813200  |
| H | -3.39412500 | 2.01050100  | 1.68978400  |
| H | -0.03013500 | 0.14944900  | -1.43384500 |
| H | -0.78720400 | -1.33422000 | -2.01558300 |
| O | 3.64923300  | -0.40885300 | -0.24532200 |
| C | 4.56847900  | 0.68424100  | 0.01303500  |
| H | 5.55723200  | 0.22731000  | 0.02273700  |
| H | 4.37782600  | 1.10743400  | 1.00221700  |
| C | 4.45229000  | 1.74854200  | -1.05882100 |
| H | 4.62320100  | 1.31360100  | -2.04330300 |
| H | 3.45949200  | 2.19435500  | -1.03712400 |
| H | 5.19538600  | 2.53021400  | -0.88980900 |
| C | 2.38994900  | -1.08086600 | 2.05555900  |
| H | 3.03994100  | -0.42573700 | 2.63609200  |
| H | 2.83511100  | -2.07135200 | 1.98272500  |
| H | 1.41896500  | -1.14788000 | 2.54148100  |

# VX [S]

|   |             |             |             |
|---|-------------|-------------|-------------|
| N | 2.17806900  | -0.28921900 | -0.18906400 |
| C | 0.93394900  | 0.29411100  | -0.65083000 |
| C | 3.40372400  | 0.48788500  | -0.40573200 |
| C | 3.83975100  | 0.38706600  | -1.87114200 |
| C | 3.34352000  | 1.96204700  | 0.03678900  |
| C | 2.04424800  | -1.05037200 | 1.06416400  |
| C | 3.00944900  | -2.23637700 | 1.10066500  |
| C | 2.15360100  | -0.20697100 | 2.34414500  |
| C | 0.11481800  | -0.74027500 | -1.42666300 |
| C | -4.03902100 | -1.49153300 | -0.31483100 |
| C | -2.30318900 | 1.71657900  | 1.35412100  |
| C | -1.96830700 | 2.90278900  | 0.47289200  |
| O | -1.56412500 | -1.29945000 | 1.00188100  |
| O | -3.13315100 | 0.76469600  | 0.64245500  |
| P | -2.51052200 | -0.61271700 | 0.08345200  |
| S | -1.60354700 | -0.17155700 | -1.79664500 |
| H | 1.13198300  | 1.13997200  | -1.30721100 |
| H | 0.33056600  | 0.68309000  | 0.17775600  |
| H | 4.17493800  | 0.00367800  | 0.19423400  |
| H | 3.09299100  | 0.83367000  | -2.53144100 |
| H | 4.78185100  | 0.91262400  | -2.03846600 |
| H | 3.96203000  | -0.65634400 | -2.15885400 |
| H | 4.32824100  | 2.42286100  | -0.05931000 |
| H | 3.02445300  | 2.06060400  | 1.07209700  |
| H | 2.65575600  | 2.53794700  | -0.58444200 |
| H | 1.03235100  | -1.45737000 | 1.04764900  |
| H | 2.81591600  | -2.85641300 | 1.97732500  |
| H | 4.05068200  | -1.91265800 | 1.15483300  |
| H | 2.89133800  | -2.84876500 | 0.20712200  |
| H | 1.90199100  | -0.81187700 | 3.21642800  |
| H | 1.46495100  | 0.63843000  | 2.31850600  |
| H | 3.16523100  | 0.17735500  | 2.48578800  |

|   |             |             |             |
|---|-------------|-------------|-------------|
| H | 0.04121000  | -1.67132200 | -0.87415000 |
| H | 0.56973700  | -0.94420500 | -2.39463300 |
| H | -4.63543500 | -0.90624600 | -1.01233000 |
| H | -3.78234600 | -2.44883000 | -0.76233800 |
| H | -4.59686200 | -1.64680600 | 0.60753700  |
| H | -2.88926100 | 2.02028800  | 2.22082100  |
| H | -1.40762000 | 1.21040900  | 1.71682200  |
| H | -1.39268000 | 3.63459600  | 1.04254100  |
| H | -2.87938400 | 3.38195000  | 0.11500800  |
| H | -1.38158300 | 2.59190000  | -0.38946700 |

## Figures S1-S8

Radius of gyration of protein-ligand complex as a function of simulation steps

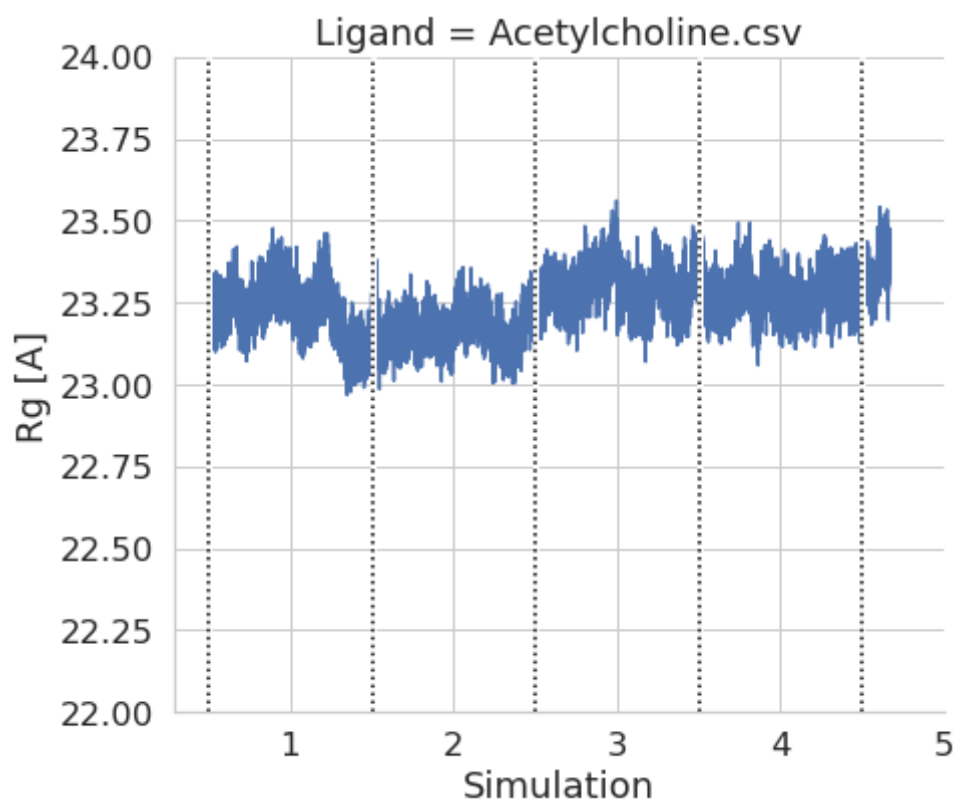

Figure S1. Radius of gyration of protein-acetylcholine complex as a function of simulation steps

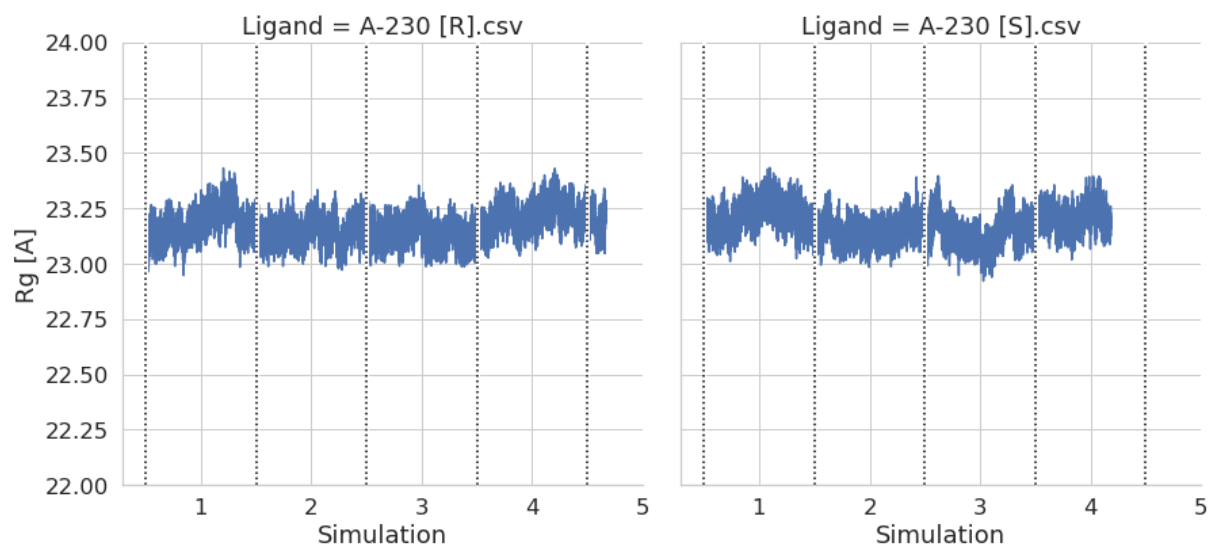

Figure S2. Radius of gyration of protein-A-230 complex as a function of simulation steps

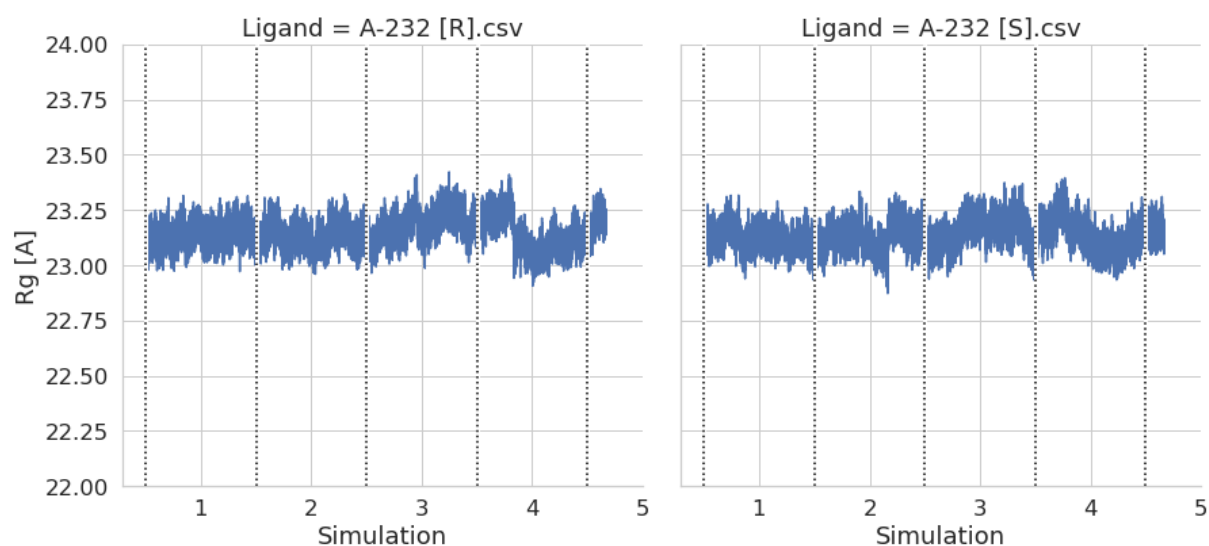

Figure S3. Radius of gyration of protein-A-232 complex as a function of simulation steps

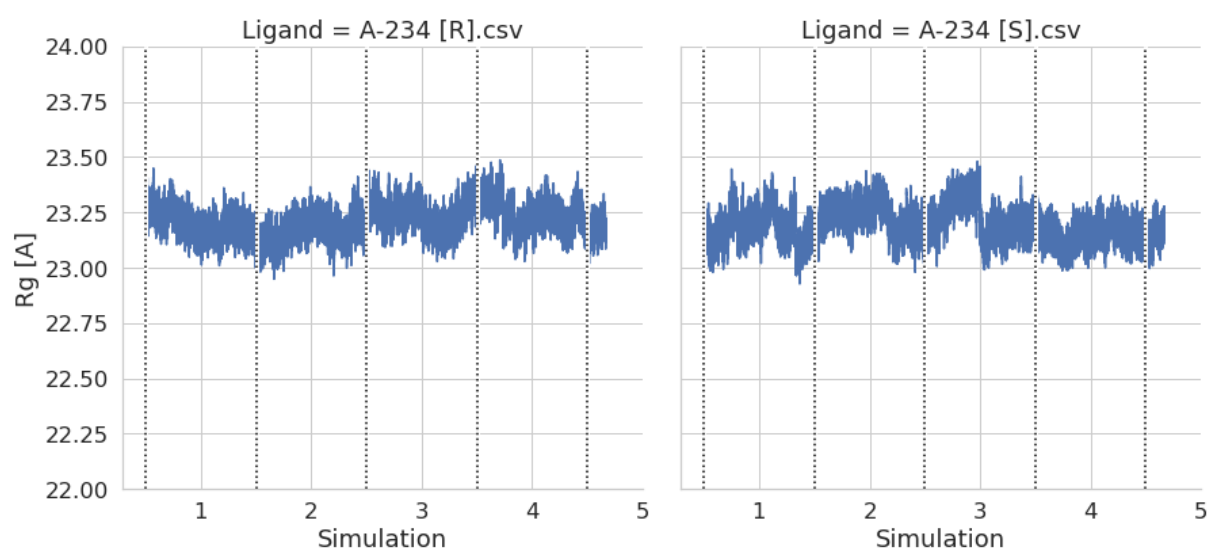

Figure S4. Radius of gyration of protein-A-234 complex as a function of simulation steps

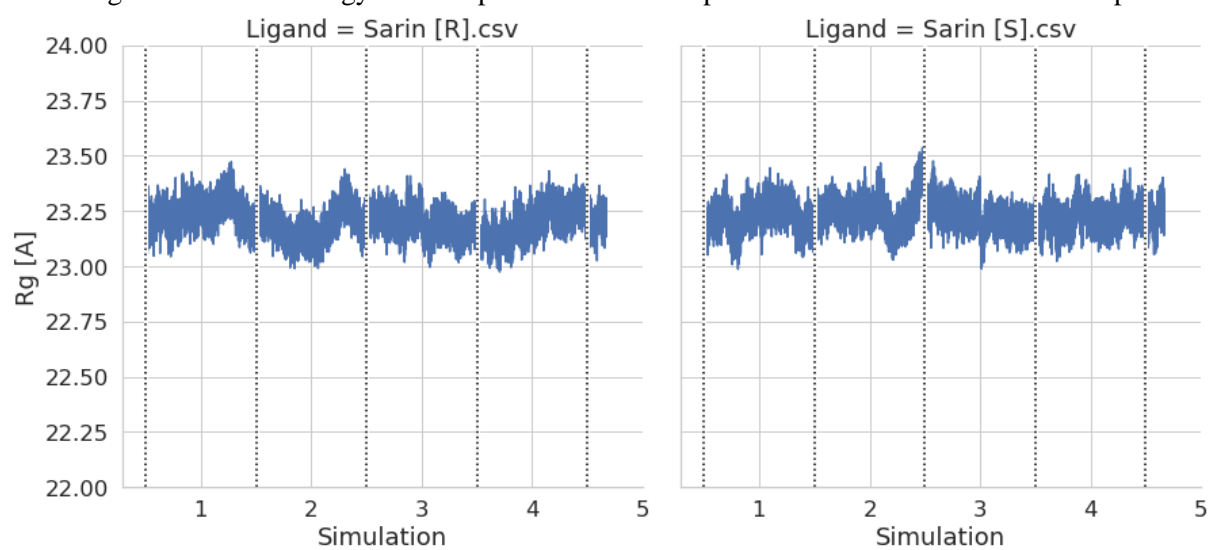

Figure S5. Radius of gyration of protein-sarin complex as a function of simulation steps

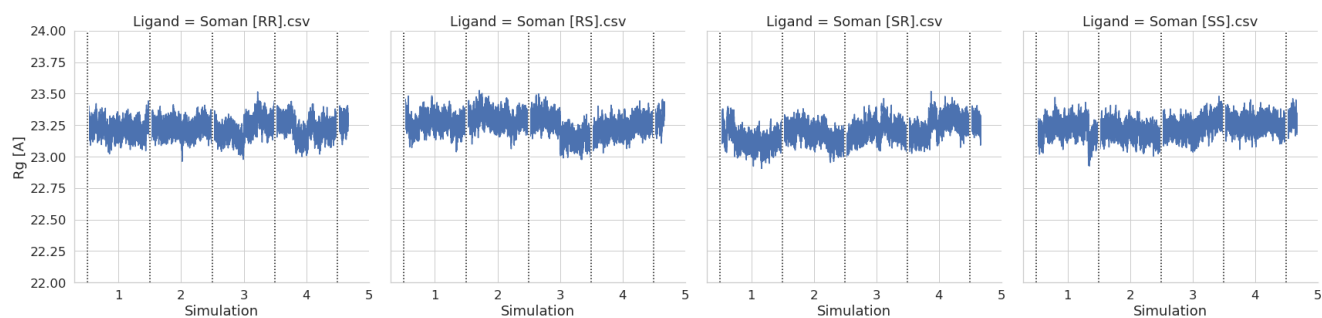

Figure S6. Radius of gyration of protein-soman complex as a function of simulation steps

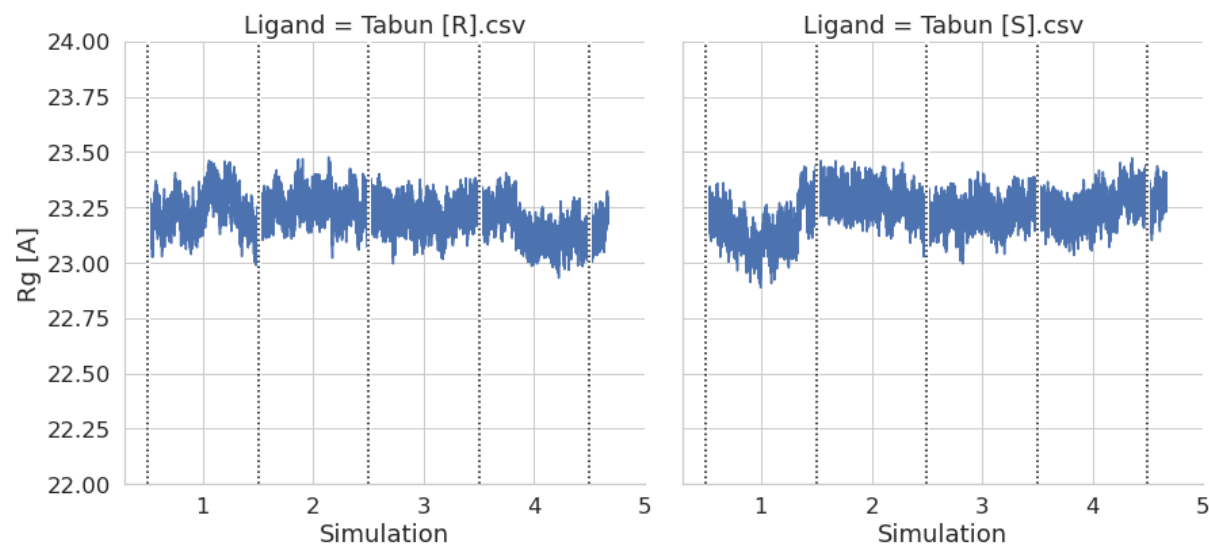

Figure S7. Radius of gyration of protein-tabun complex as a function of simulation steps

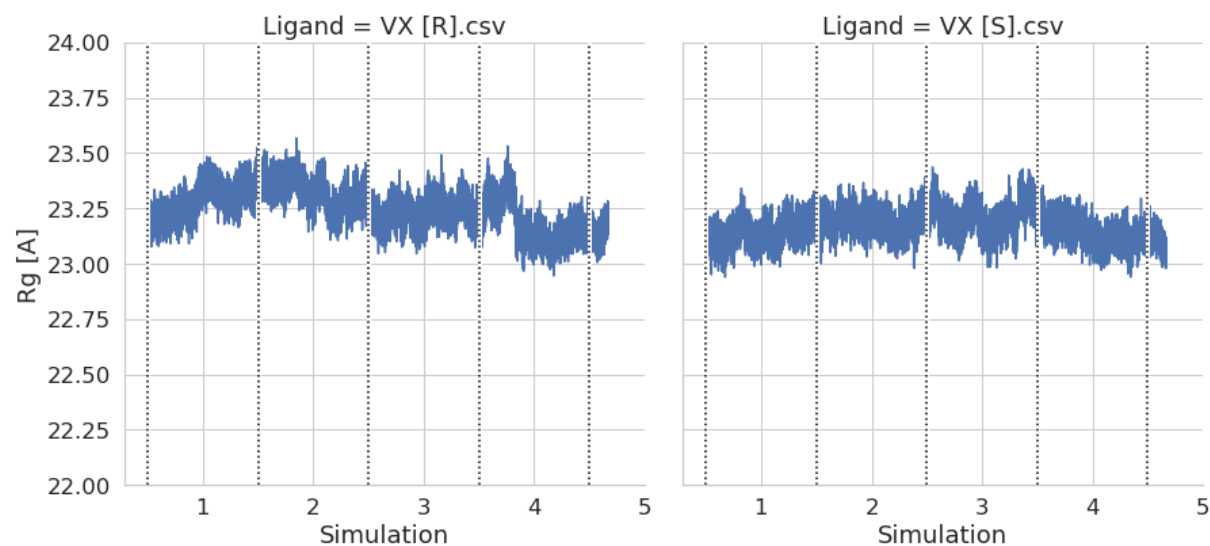

Figure S8. Radius of gyration of protein-VX complex as a function of simulation steps

## Figures S9-S16

RMSD of protein-ligand complex as a function of simulation steps

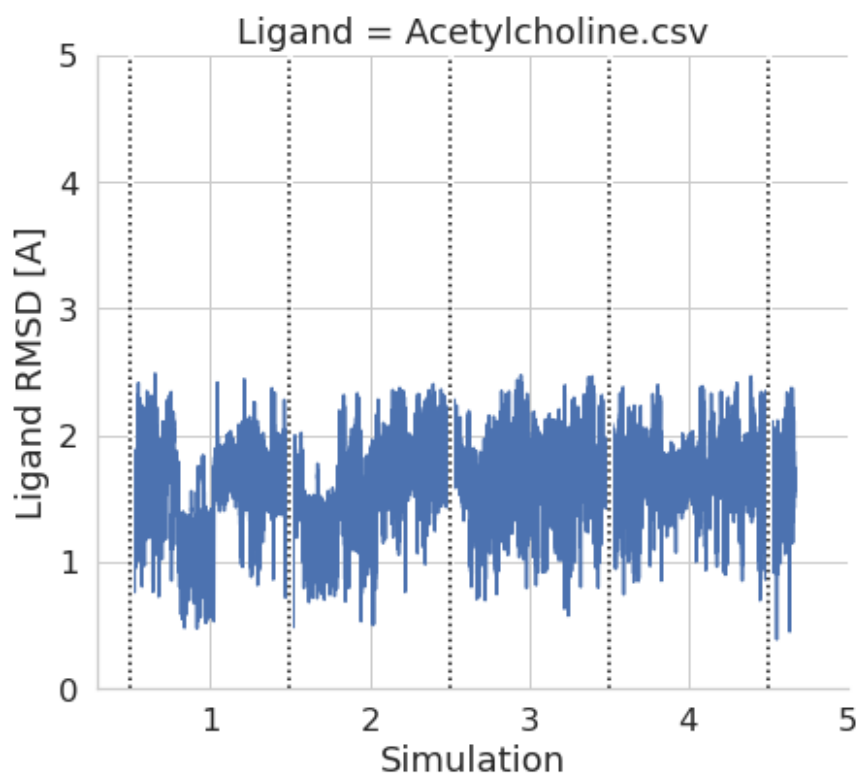

Figure S9. RMSD of protein-acetylcholine complex as a function of simulation steps

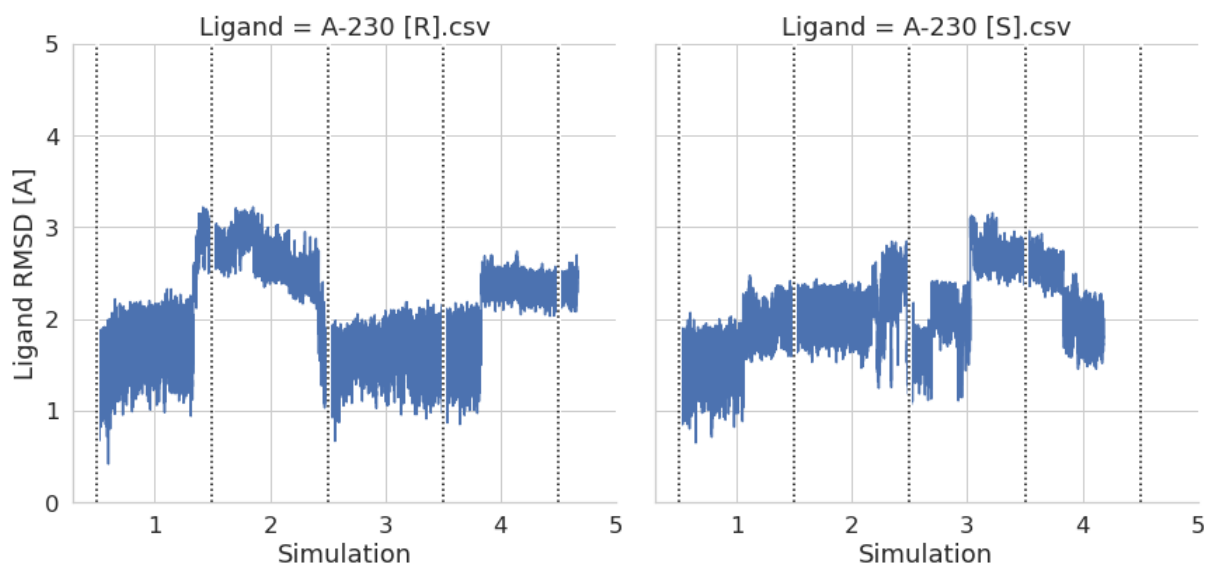

Figure S10. RMSD of protein-A-230 complex as a function of simulation steps

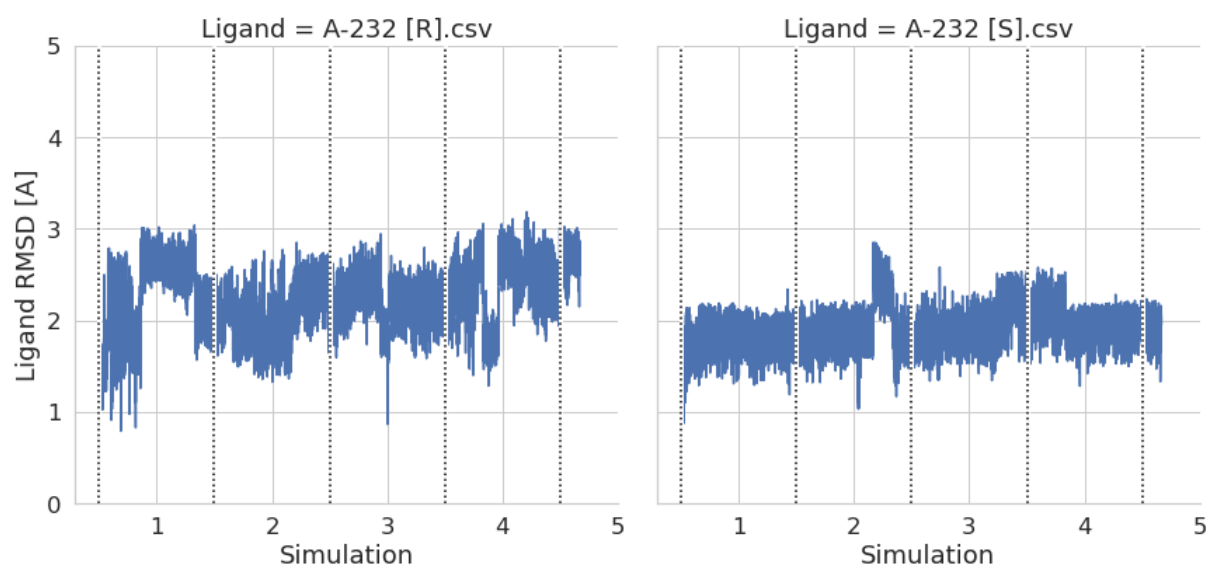

Figure S11. RMSD of protein-A-232 complex as a function of simulation steps

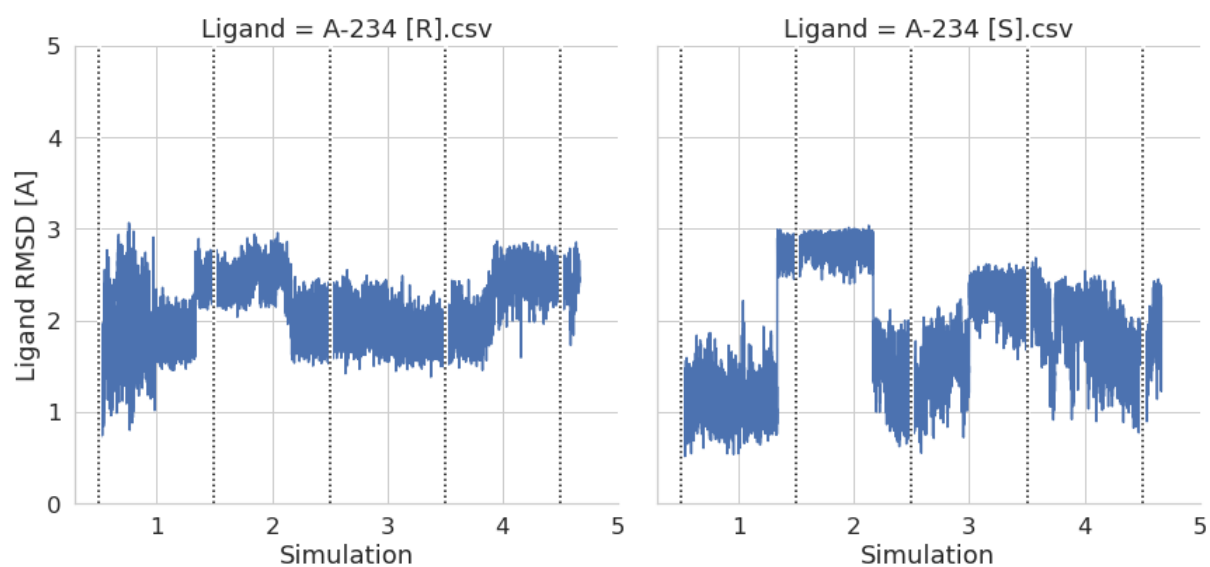

Figure S12. RMSD of protein-A234 complex as a function of simulation steps

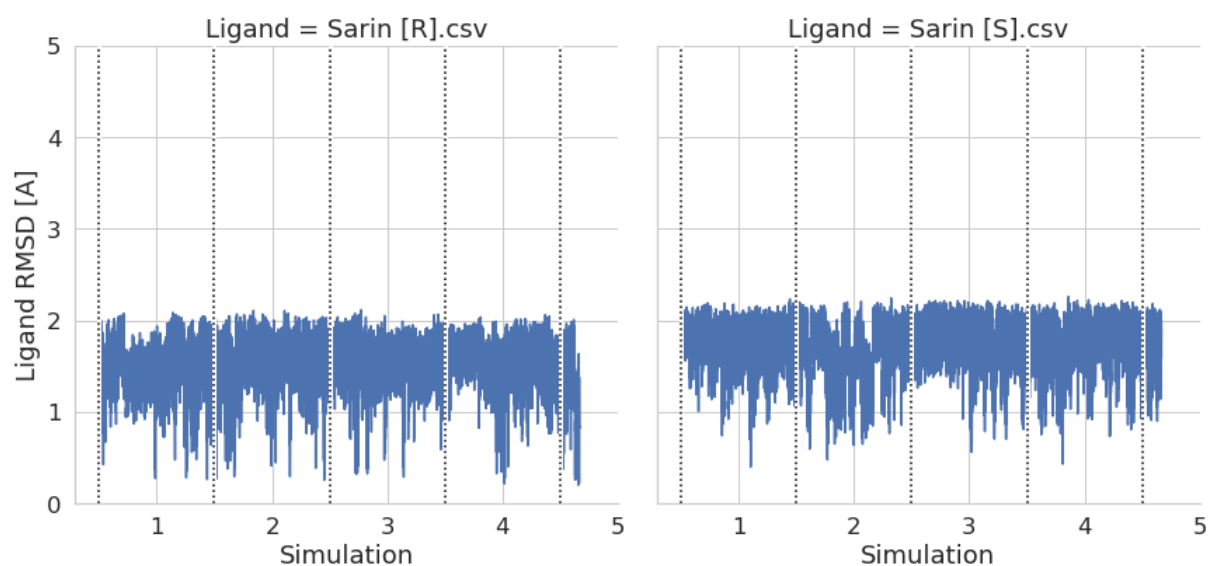

Figure S13. RMSD of protein-sarin complex as a function of simulation steps

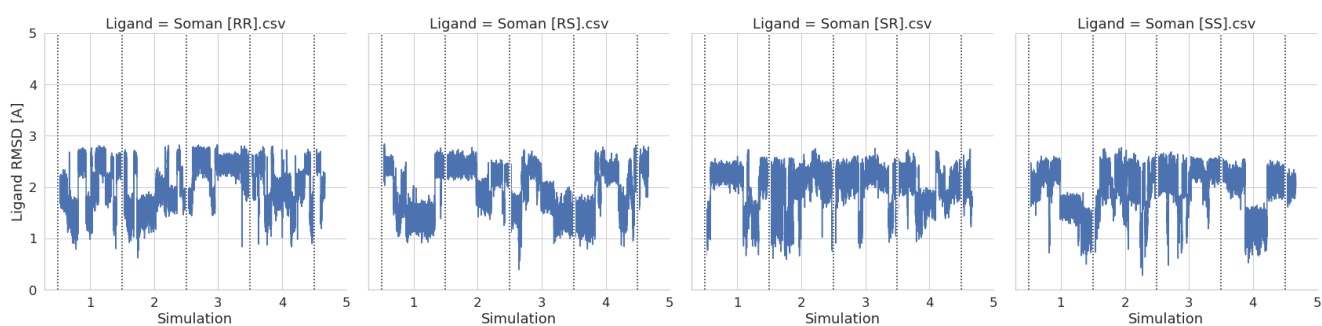

Figure S14. RMSD of protein-soman complex as a function of simulation steps

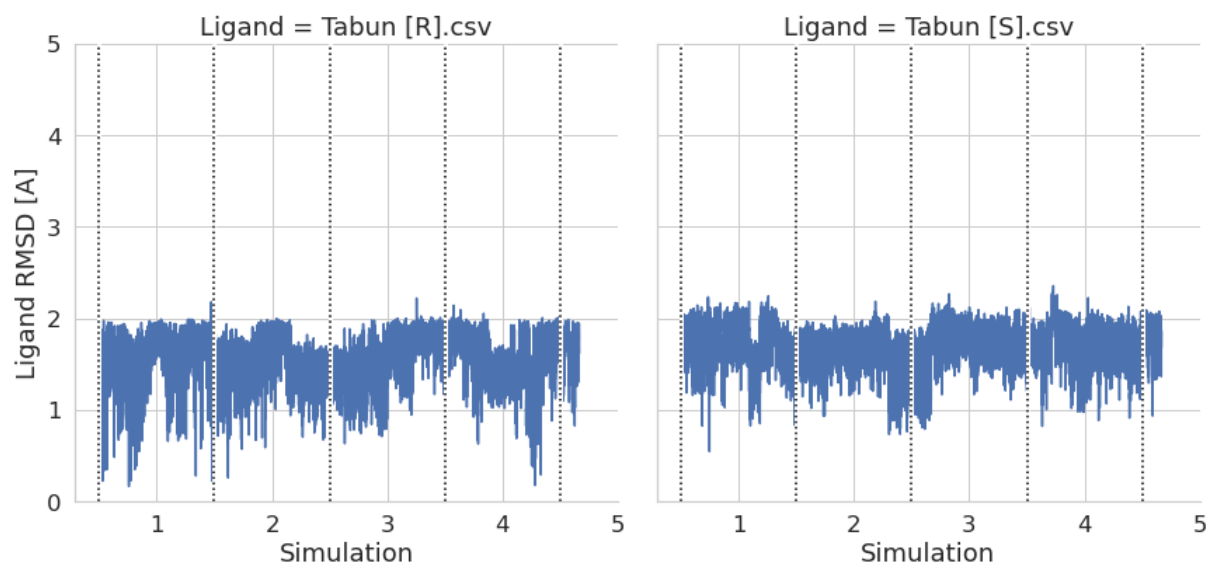

Figure S15. RMSD of protein-tabun complex as a function of simulation steps

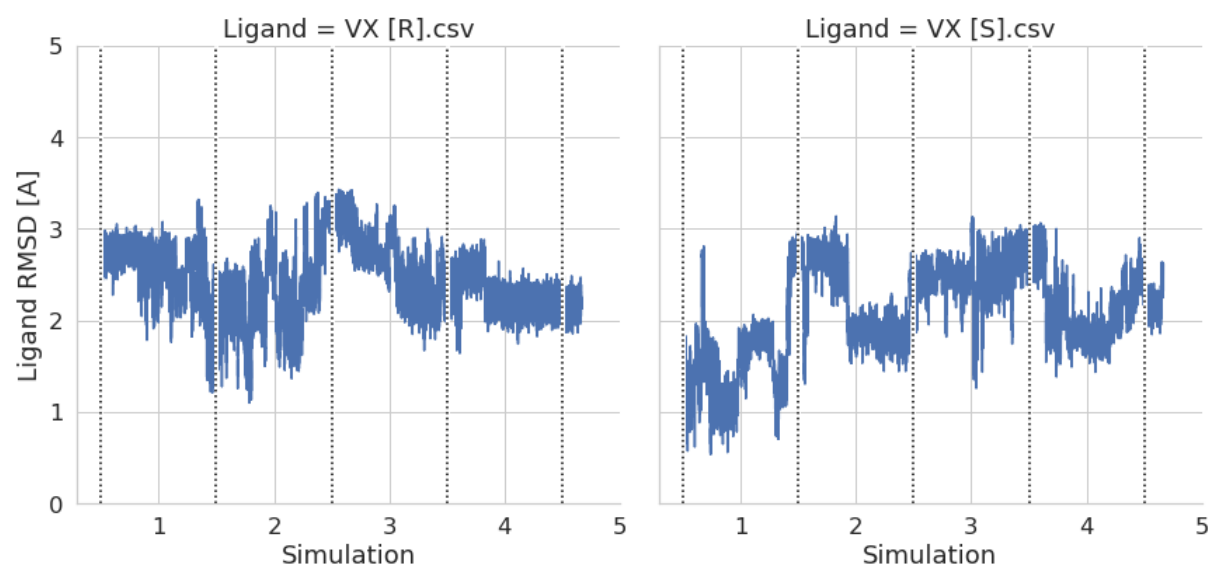

Figure S16. RMSD of protein-VX complex as a function of simulation steps

## Figures S17-S24

$C_\alpha$  RMSD of protein-ligand complex as a function of simulation steps

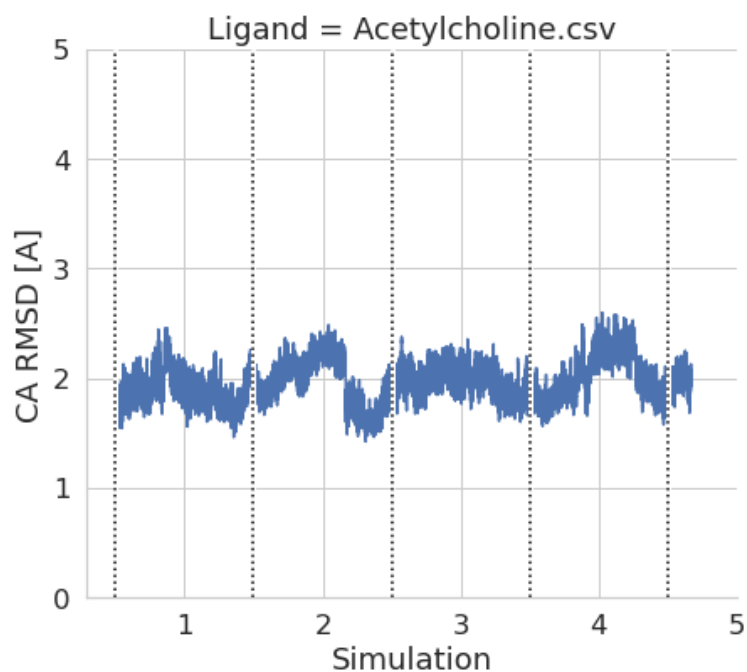

Figure S17.  $C_\alpha$  RMSD of protein-acetylcholine complex as a function of simulation steps

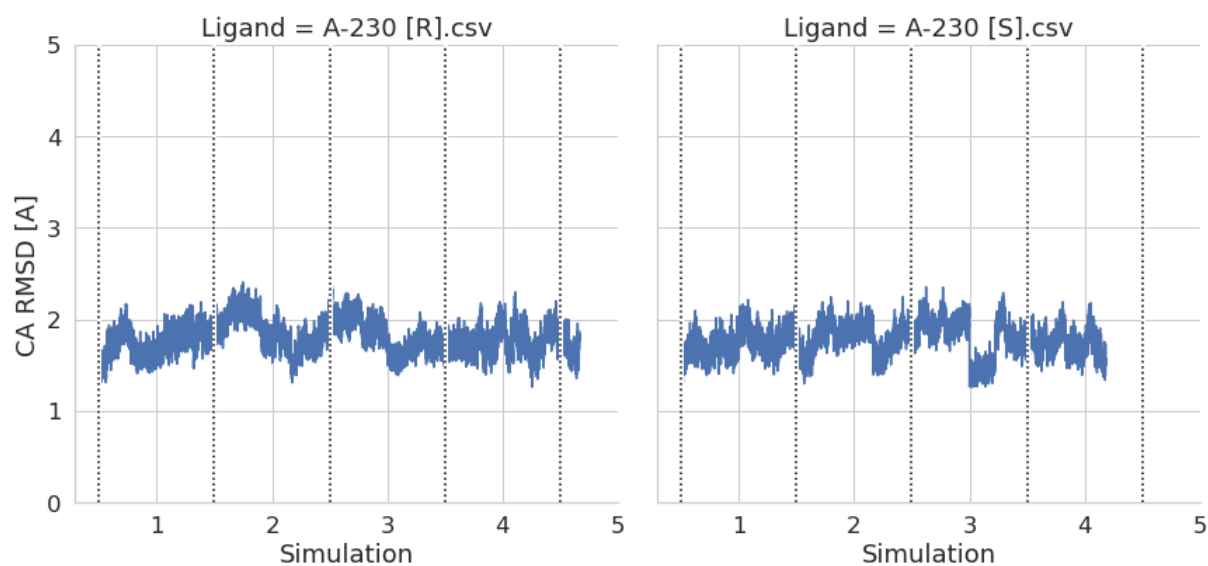

Figure S18.  $C_\alpha$  RMSD of protein-A-230 complex as a function of simulation steps

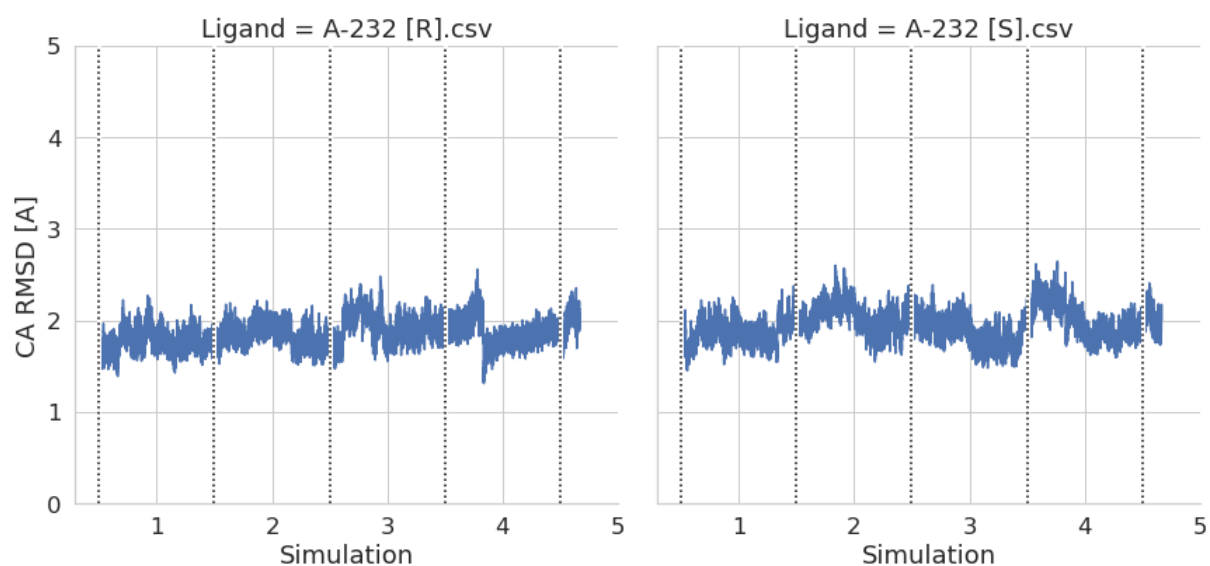

Figure S19. C $\alpha$  RMSD of protein-A-232 complex as a function of simulation steps

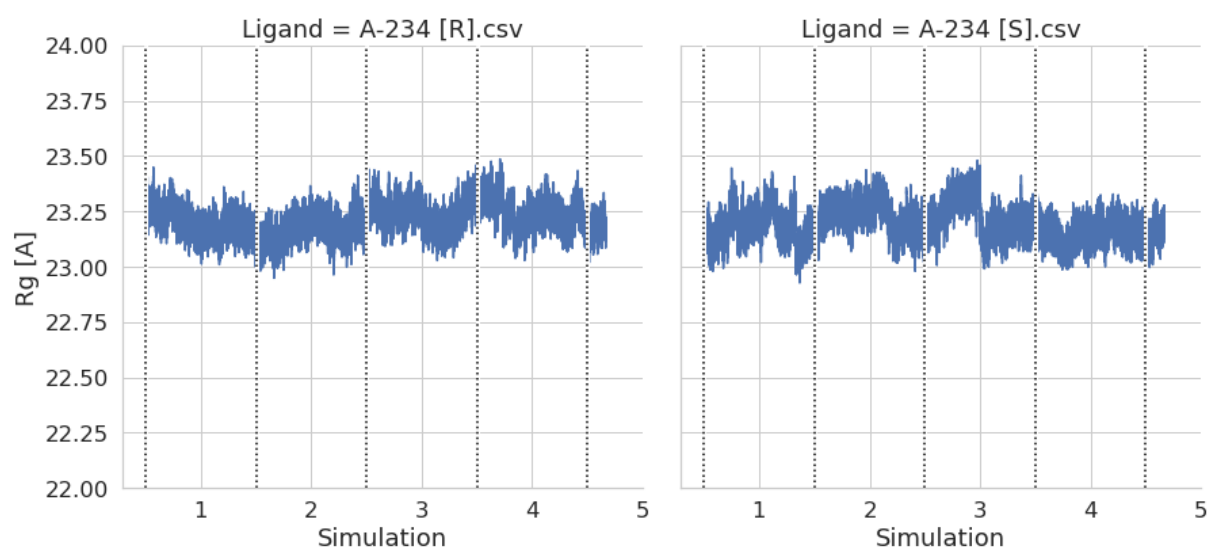

Figure S20. C $\alpha$  RMSD of protein-A-234 complex as a function of simulation steps

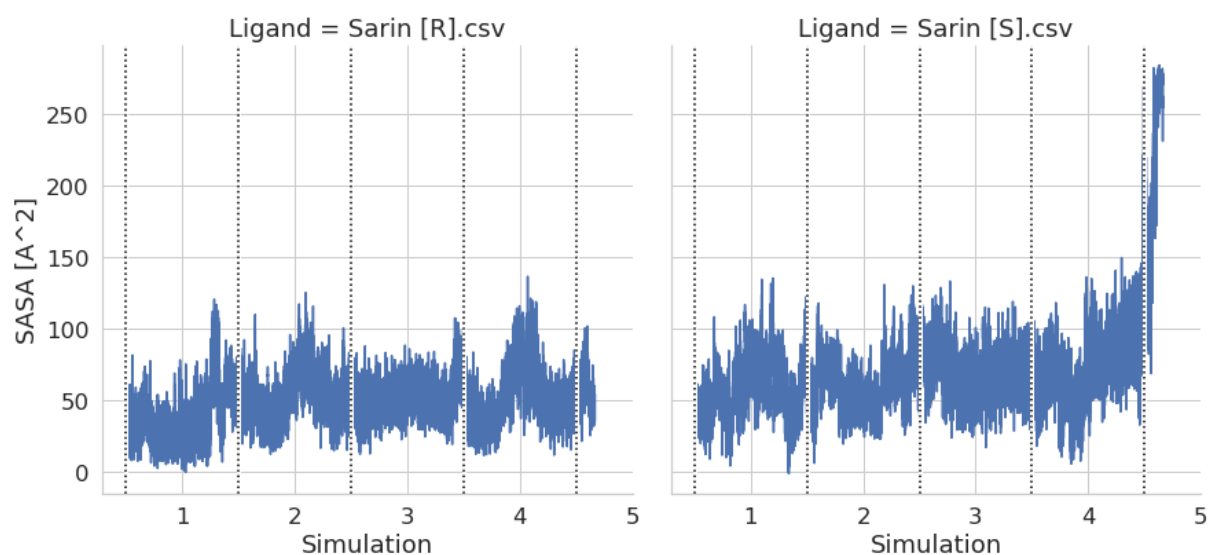

Figure S21.  $C_\alpha$  RMSD of protein-sarin complex as a function of simulation steps

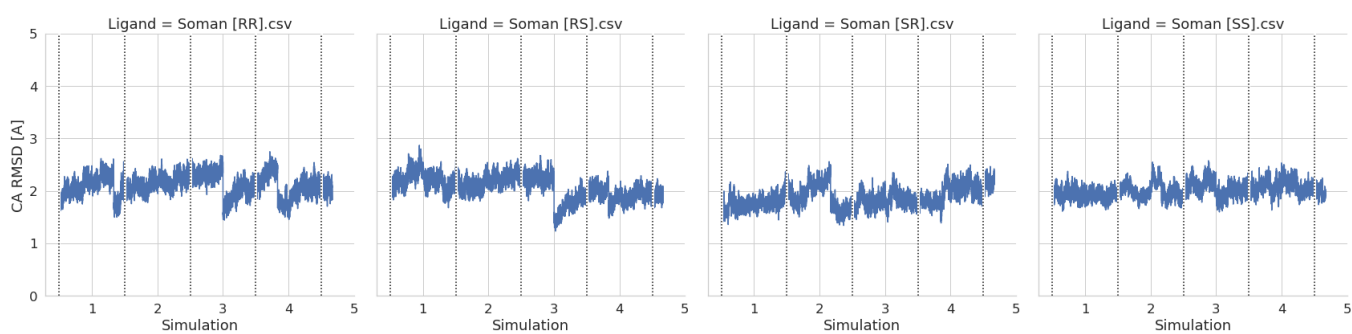

Figure S22.  $C_\alpha$  RMSD of protein-soman complex as a function of simulation steps

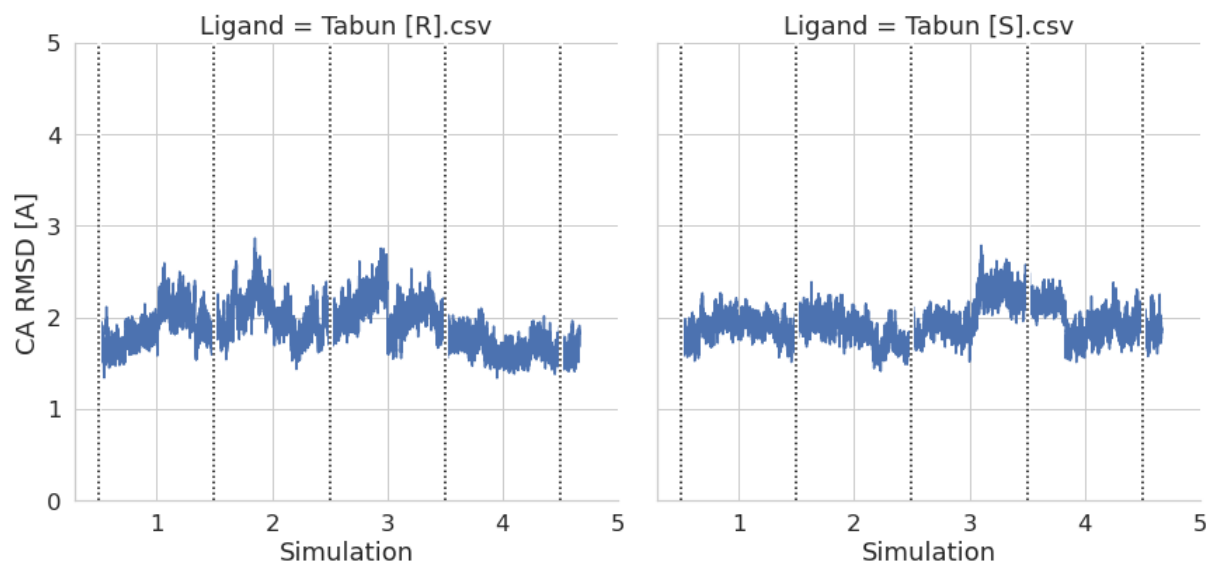

Figure S23.  $C_\alpha$  RMSD of protein-tabun complex as a function of simulation steps

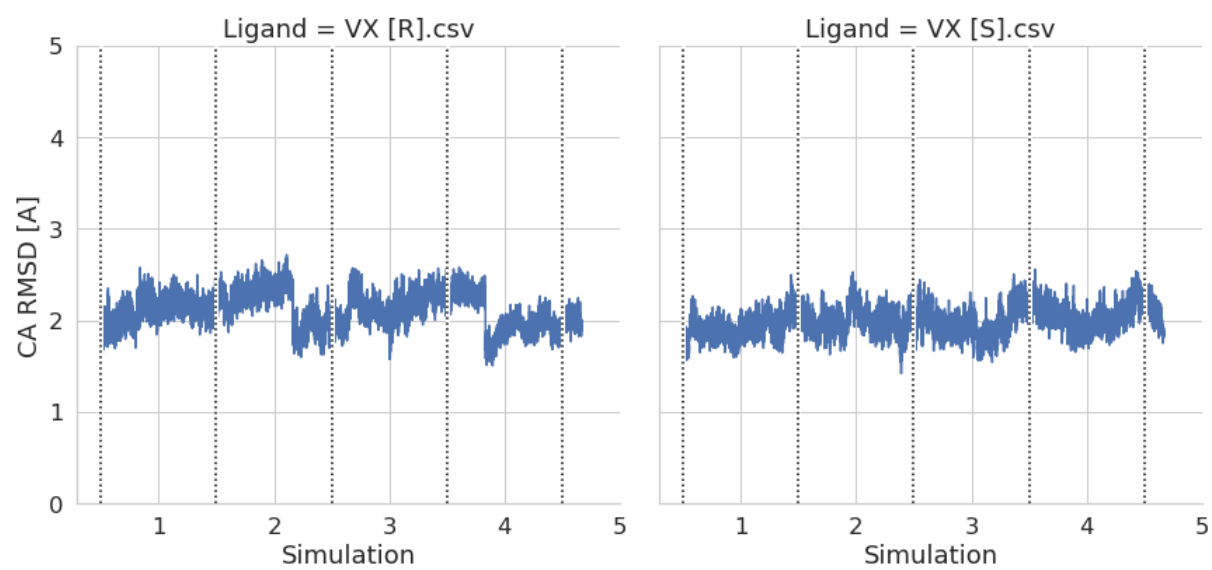

Figure S24.  $C_{\alpha}$  RMSD of protein-VX complex as a function of simulation steps

## Figures S25-S32

SASA of protein-ligand complex as a function of simulation steps

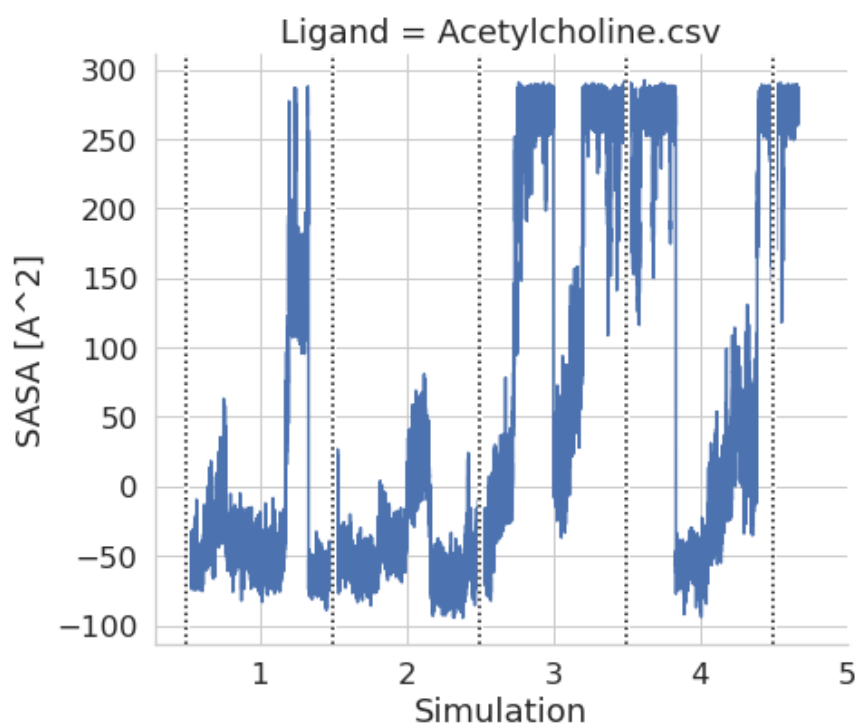

Figure S25. SASA of protein-acetylcholine complex as a function of simulation steps

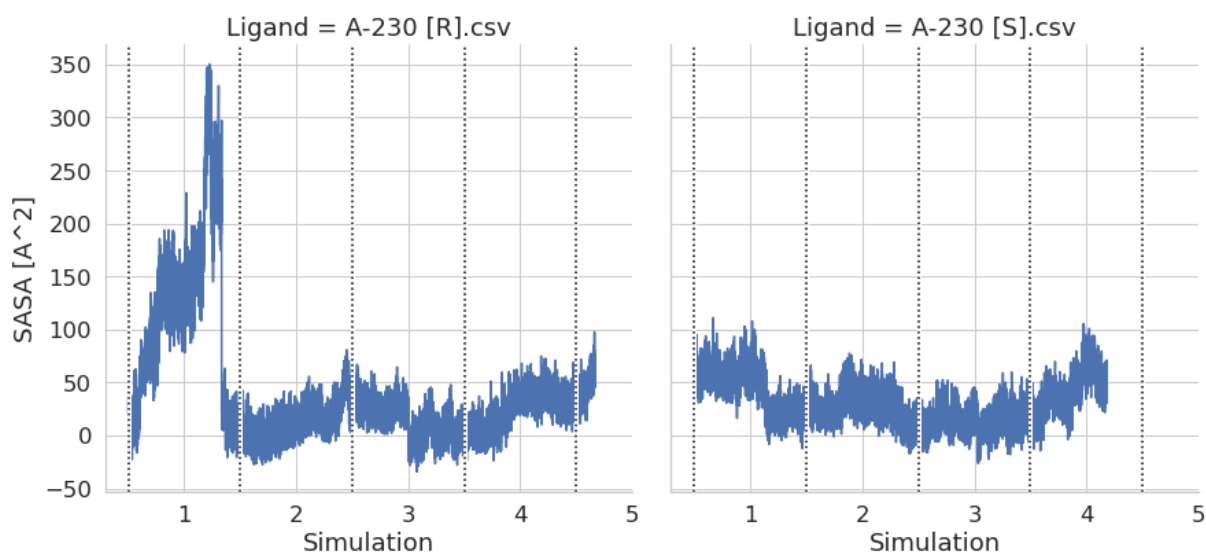

Figure S26. SASA of protein-A-230 complex as a function of simulation steps

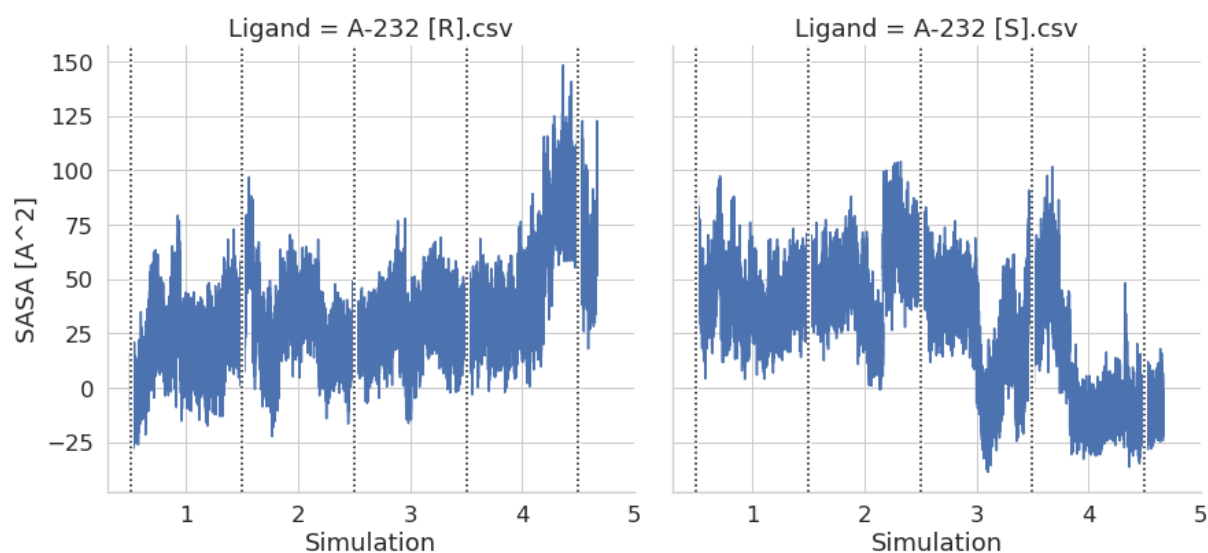

Figure S27. SASA of protein-A-232 complex as a function of simulation steps

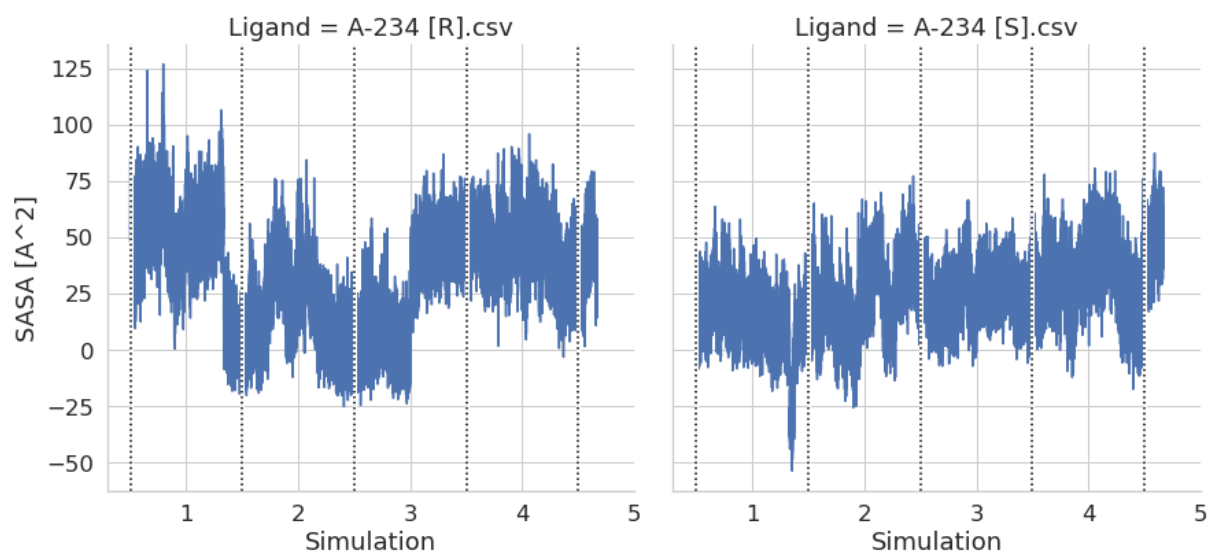

Figure S28. SASA of protein-A-234 complex as a function of simulation steps

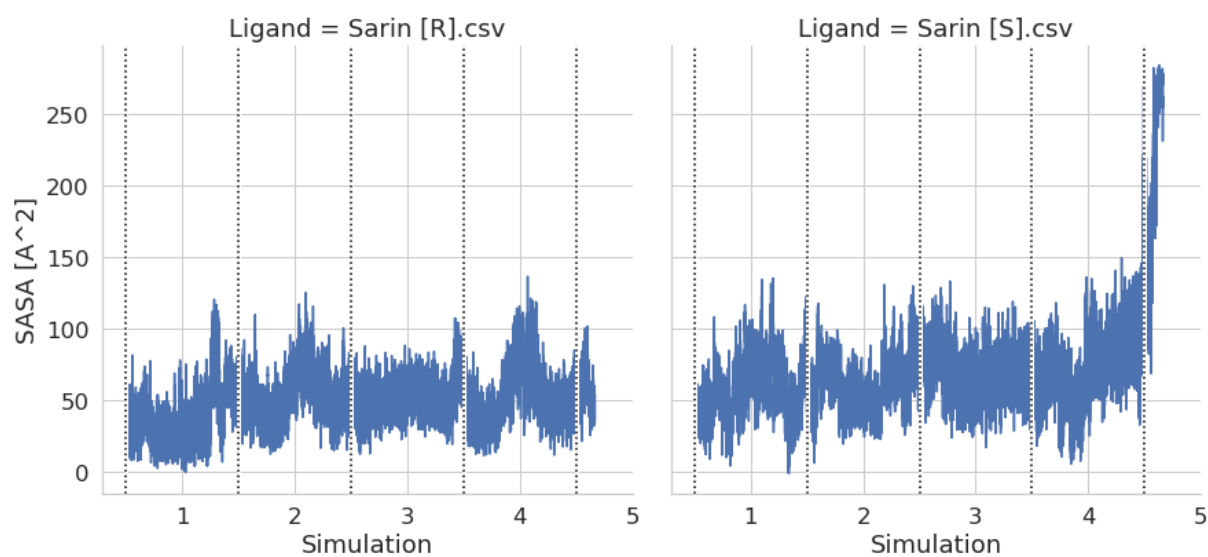

Figure S29. SASA of protein-sarin complex as a function of simulation steps

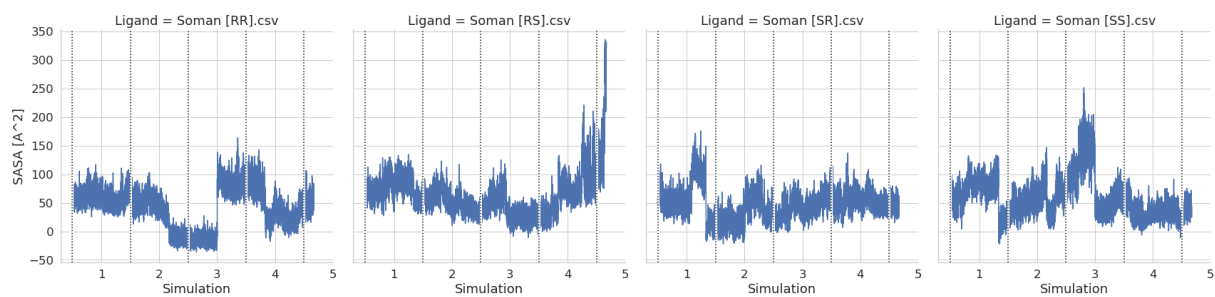

Figure S30. SASA of protein-soman complex as a function of simulation steps

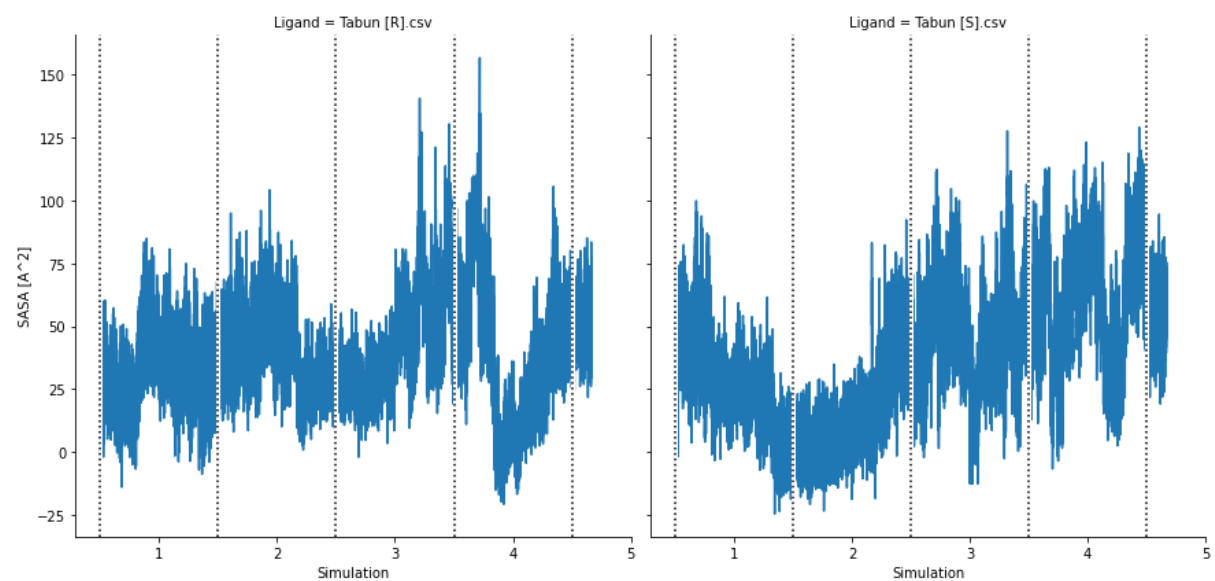

Figure S31. SASA of protein-tabun complex as a function of simulation steps

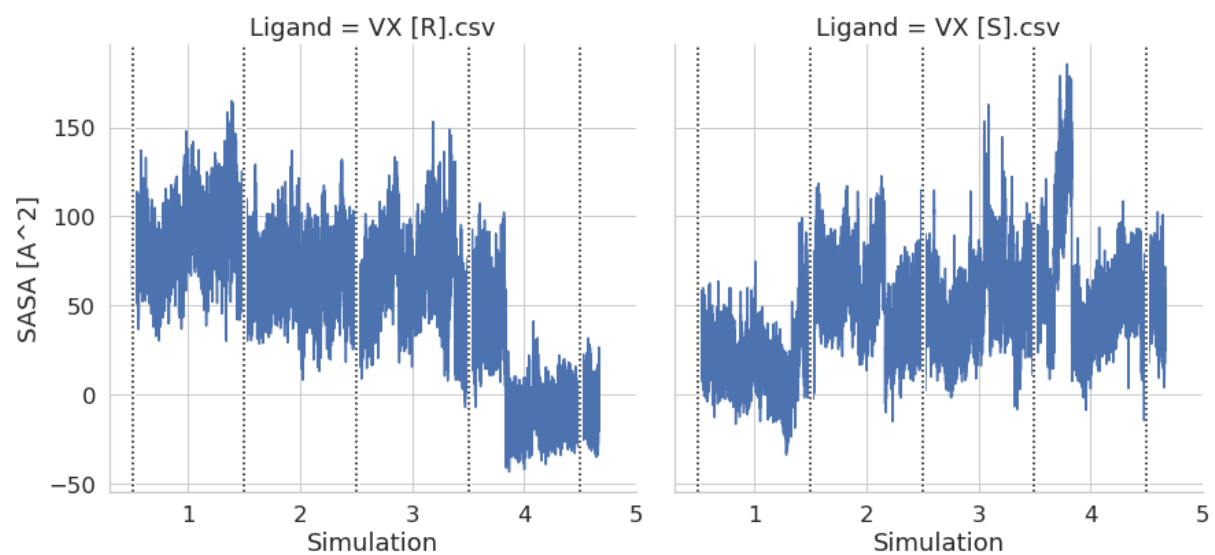

Figure S32. SASA of protein-VX complex as a function of simulation steps

## Figures S33-S38

### Interaction partitioning for the given ligands

(for the sake of clarity, we intentionally omitted the residue names in the exemplary snapshots)

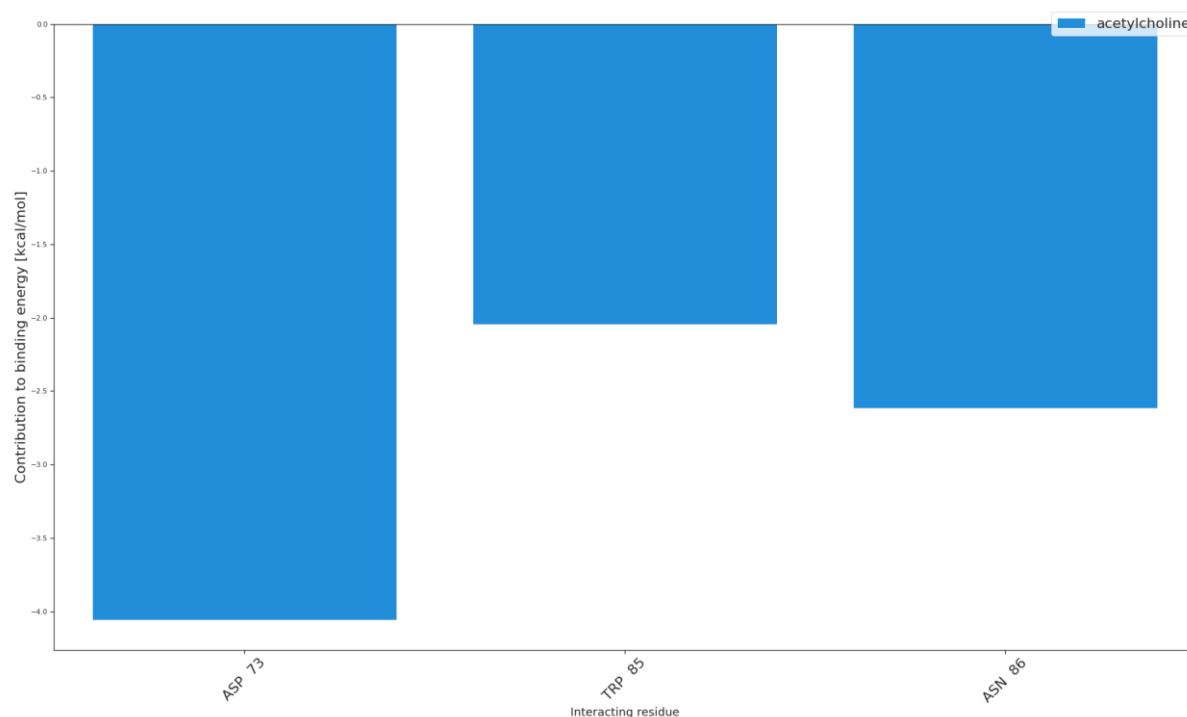

Figure S33. Interaction partitioning of protein-acetylcholine complex

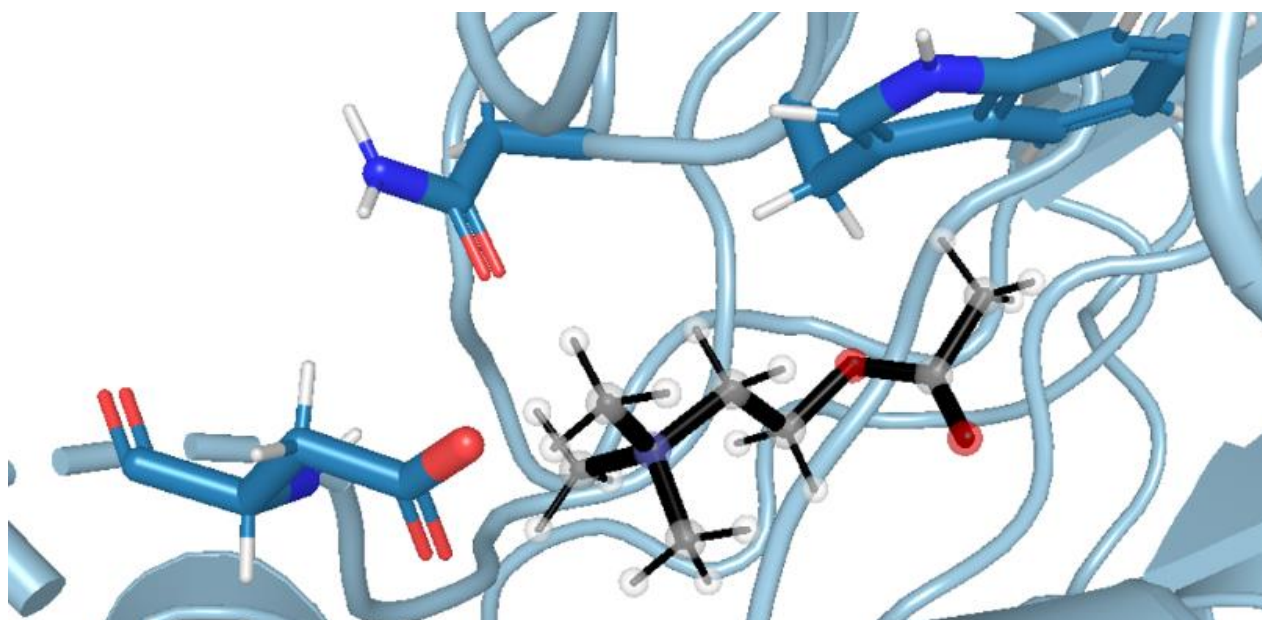

Figure S34. Exemplary snapshot of protein-acetylcholine complex surrounded by all interacting aminoacids specific for the natural agonist

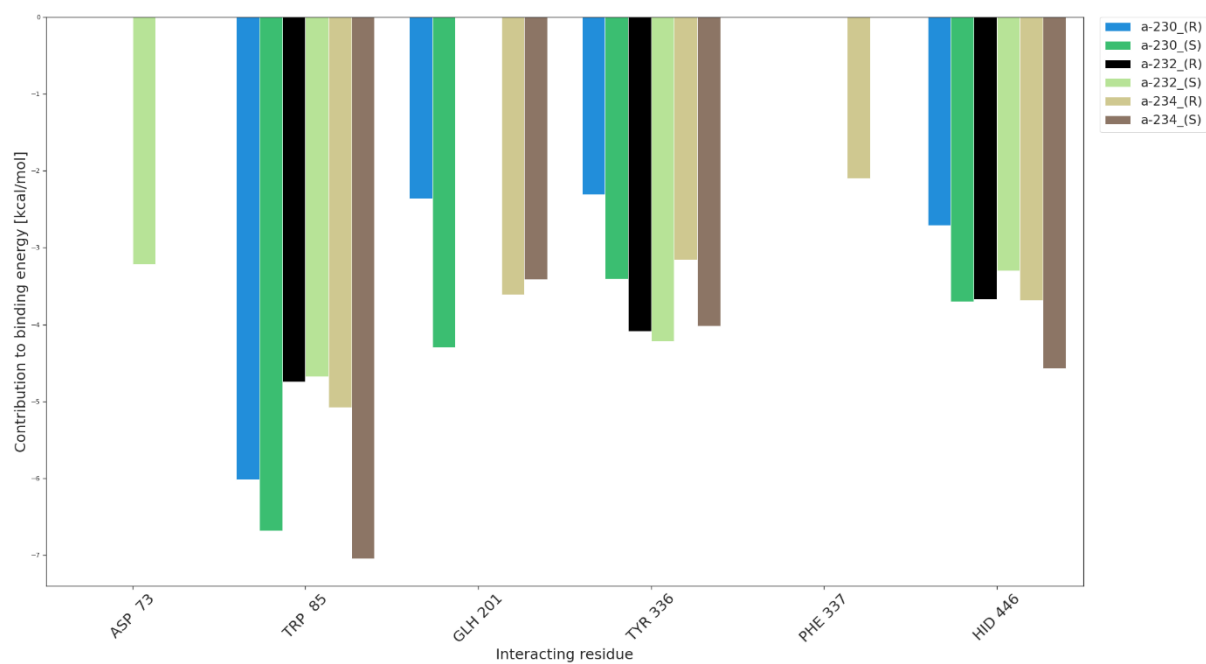

Figure S35. Interaction partitioning of protein-Novichoks complexes

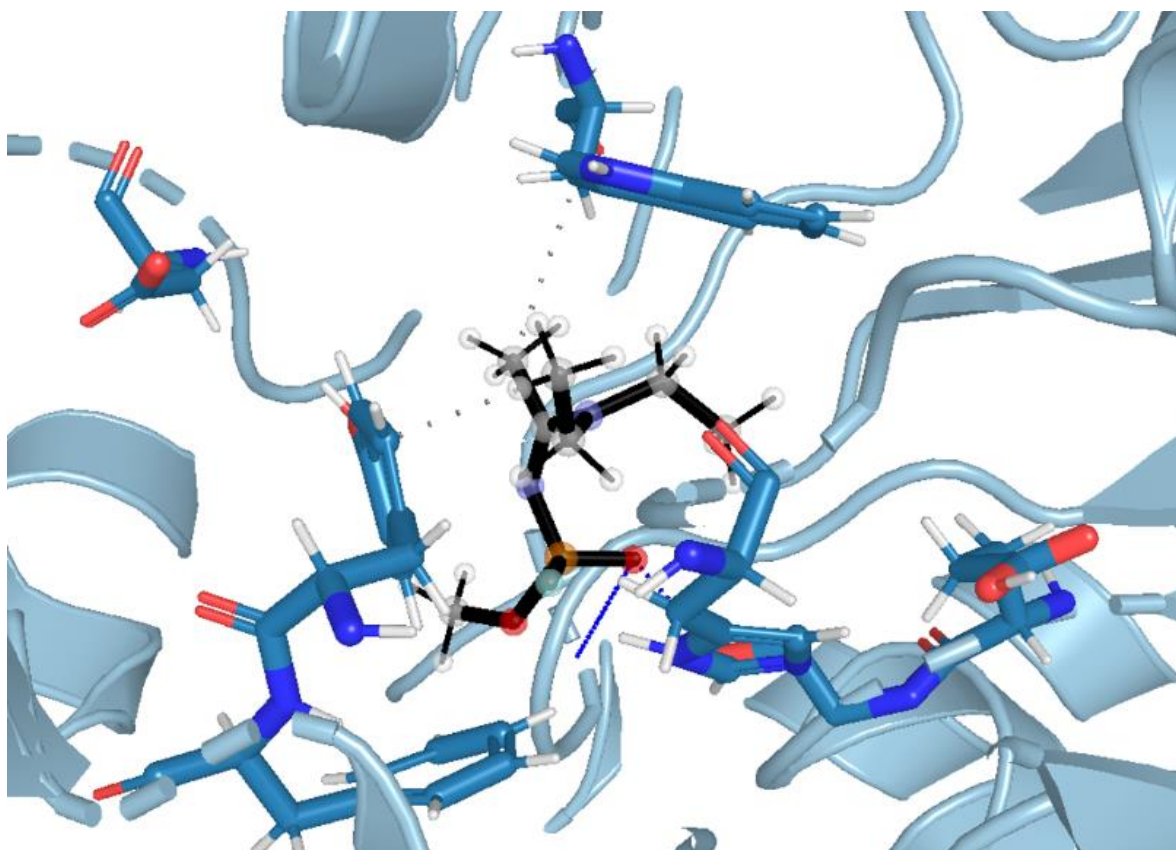

Figure S36. Exemplary snapshot of protein-A-232 complex surrounded by all interacting aminoacids specific for this tier

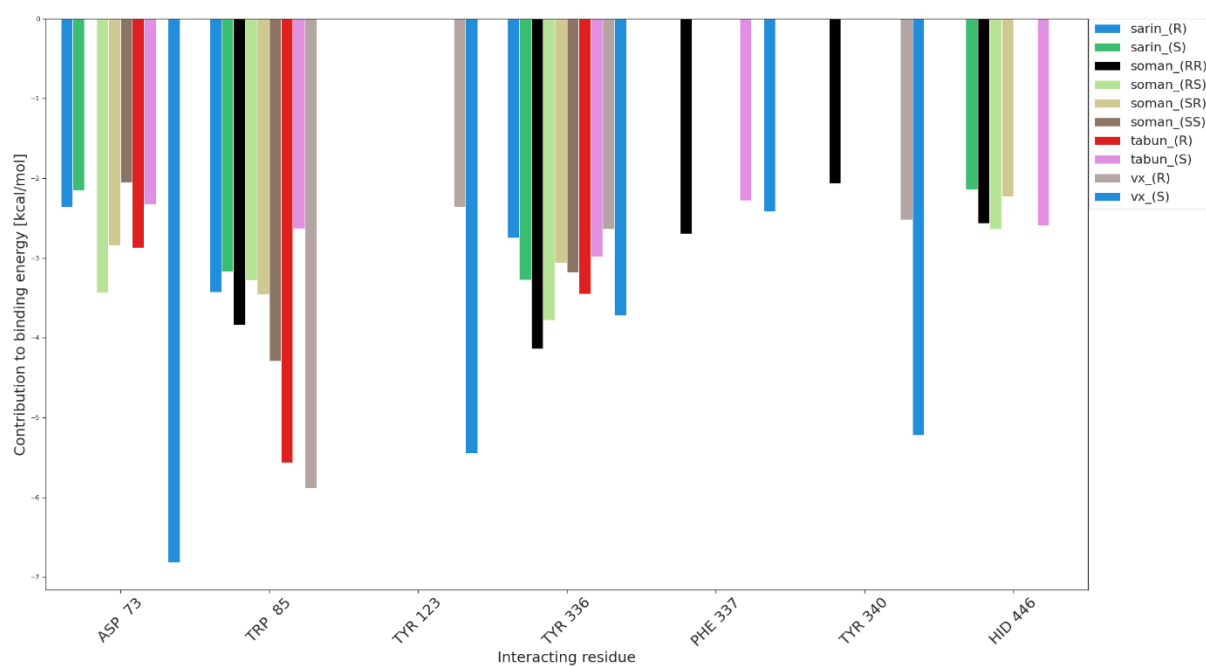

Figure S37. Interaction partitioning of protein-other OPNAs complexes

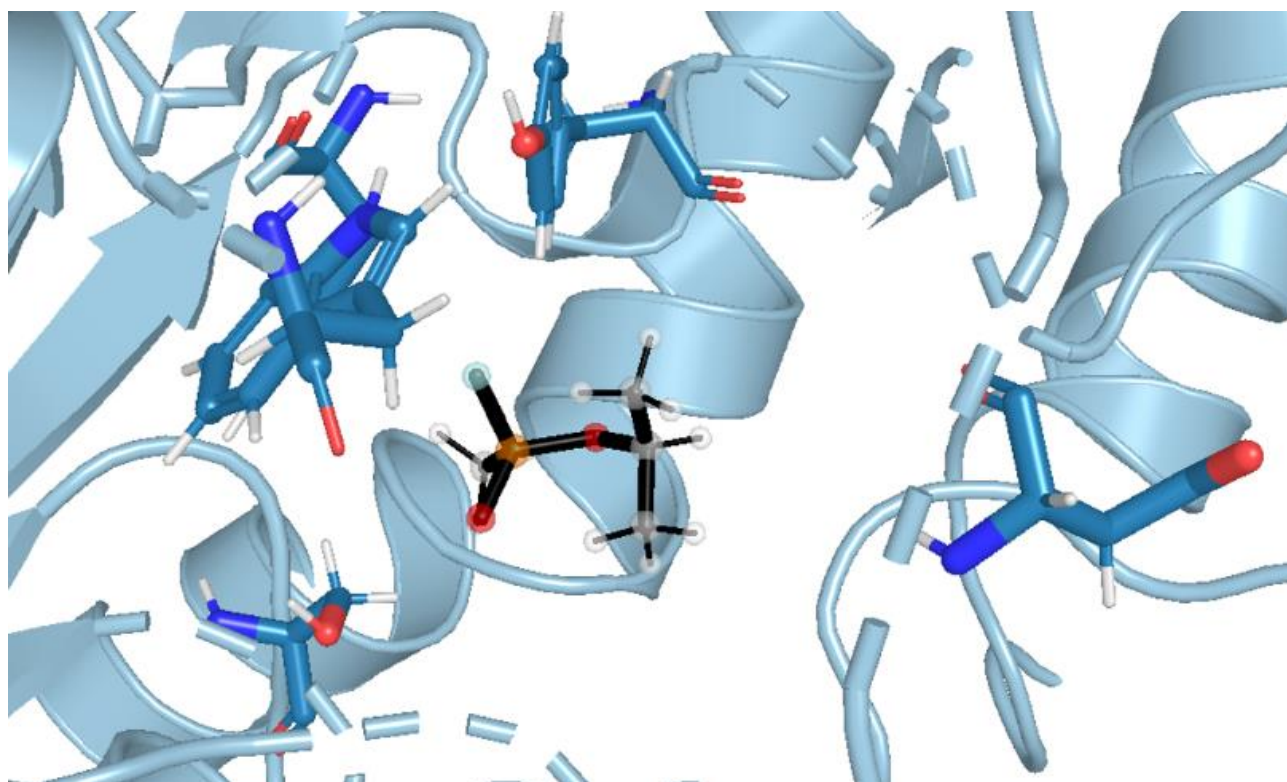

Figure S38. Exemplary snapshot of protein-sarin complex surrounded by all interacting aminoacids specific for this tier
